# Supplementary material for: Design, Synthesis and Biological Evaluation of Quinazolinamine Derivatives as Breast Cancer Resistance Protein and P-Glycoprotein Inhibitors with Improved Metabolic Stability
Source: MDPI journal article supplement (doi:10.3390/biom13020253), 2023-01-30
Supplement: s1 [file s1]

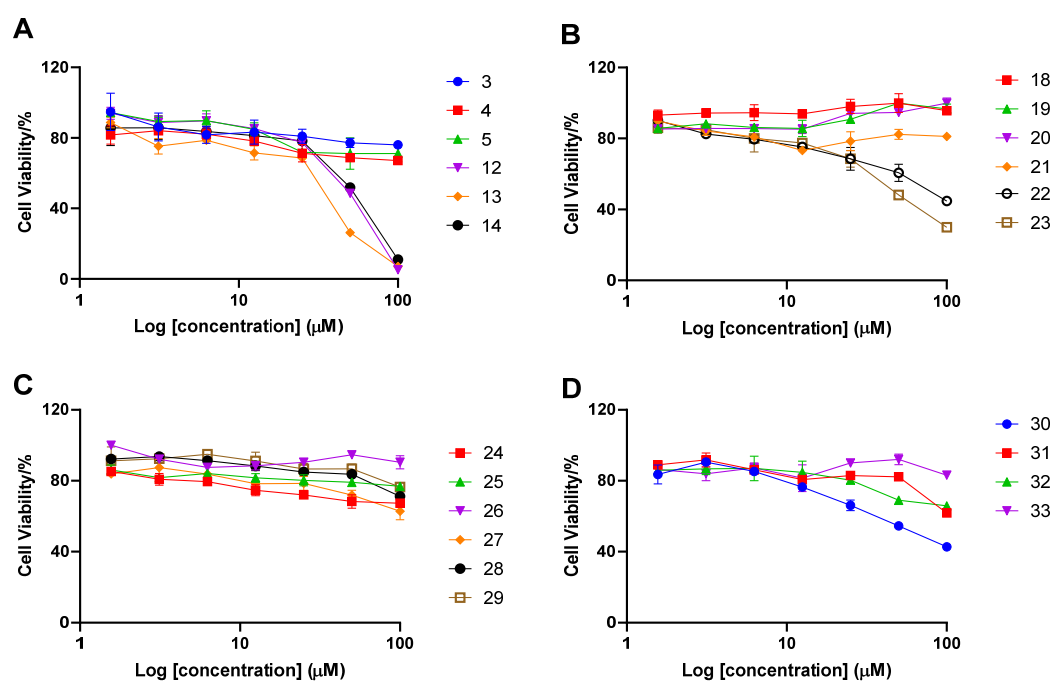

Figure S1. The cytotoxicities of quinazolinamine derivatives **3-5**, **12-14**, and **18-33** on H460 cell lines.

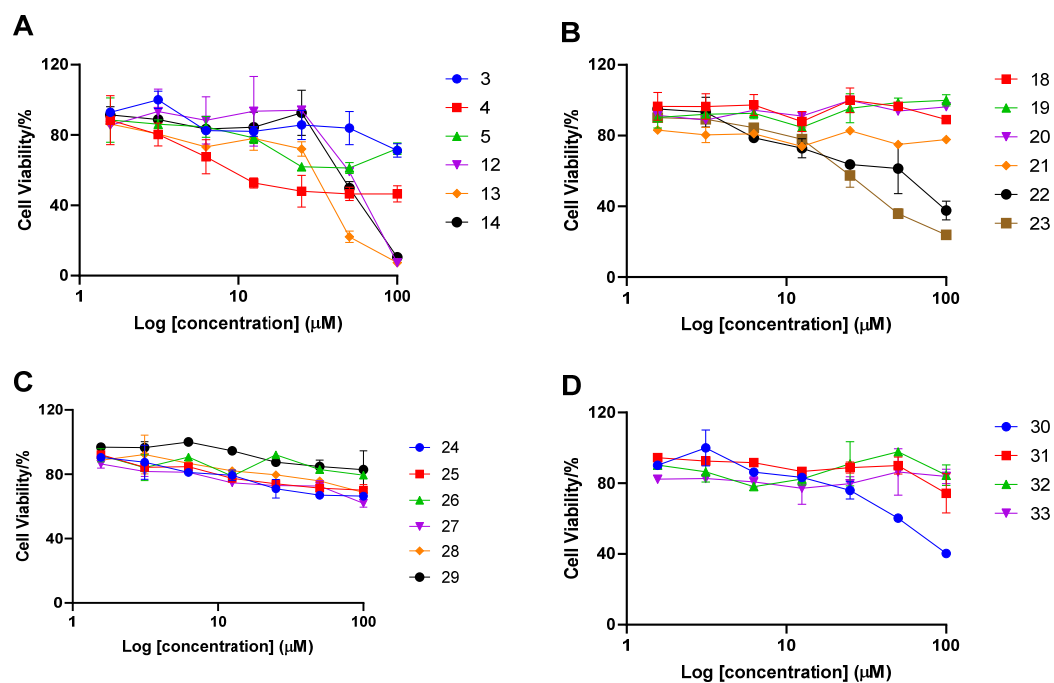

Figure S2. The cytotoxicities of quinazolinamine derivatives **3-5**, **12-14**, and **18-33** on H460/MX20 cell lines.

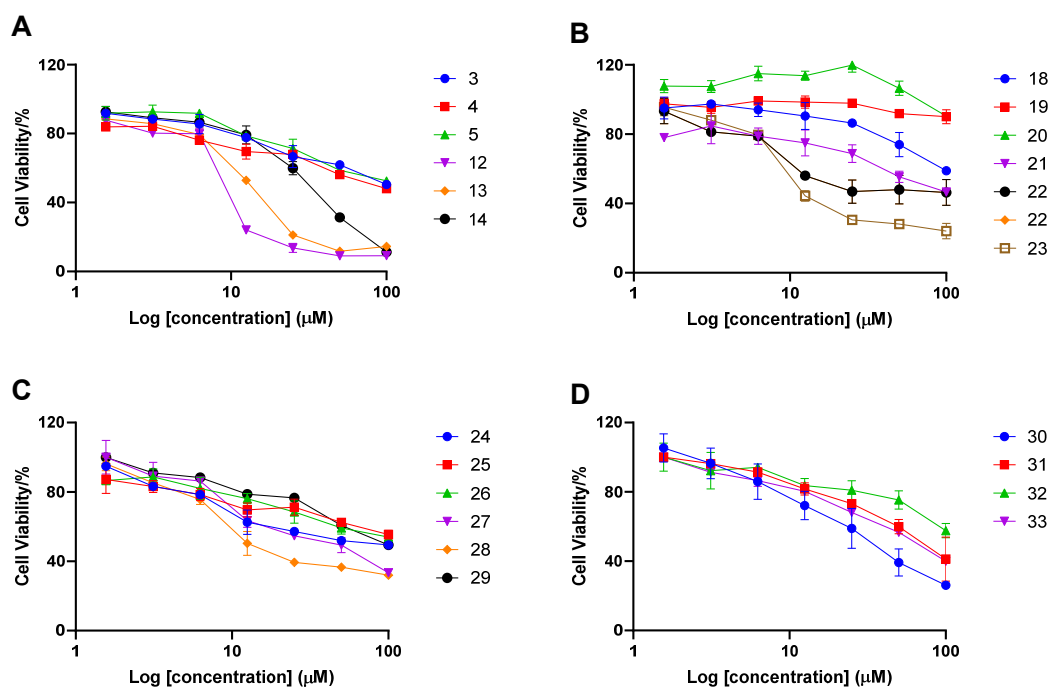

Figure S3. The cytotoxicities of quinazolinamine derivatives **3-5**, **12-14**, and **18-33** on KB-3-1 cell lines.

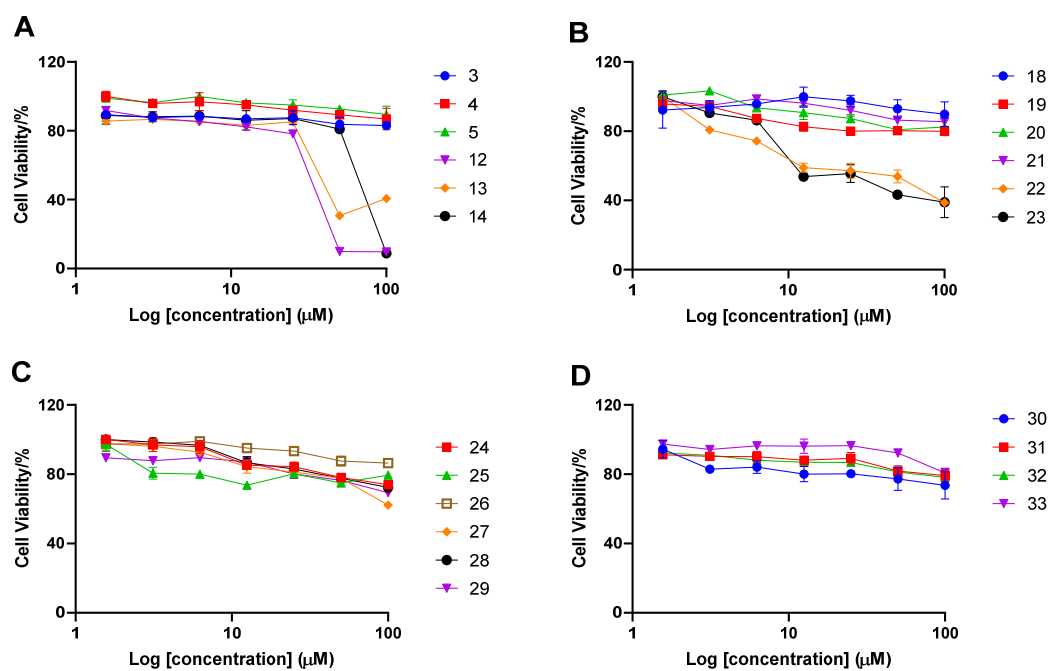

Figure S4. The cytotoxicities of quinazolinamine derivatives **3-5**, **12-14**, and **18-33** on KB-C2 cell lines.

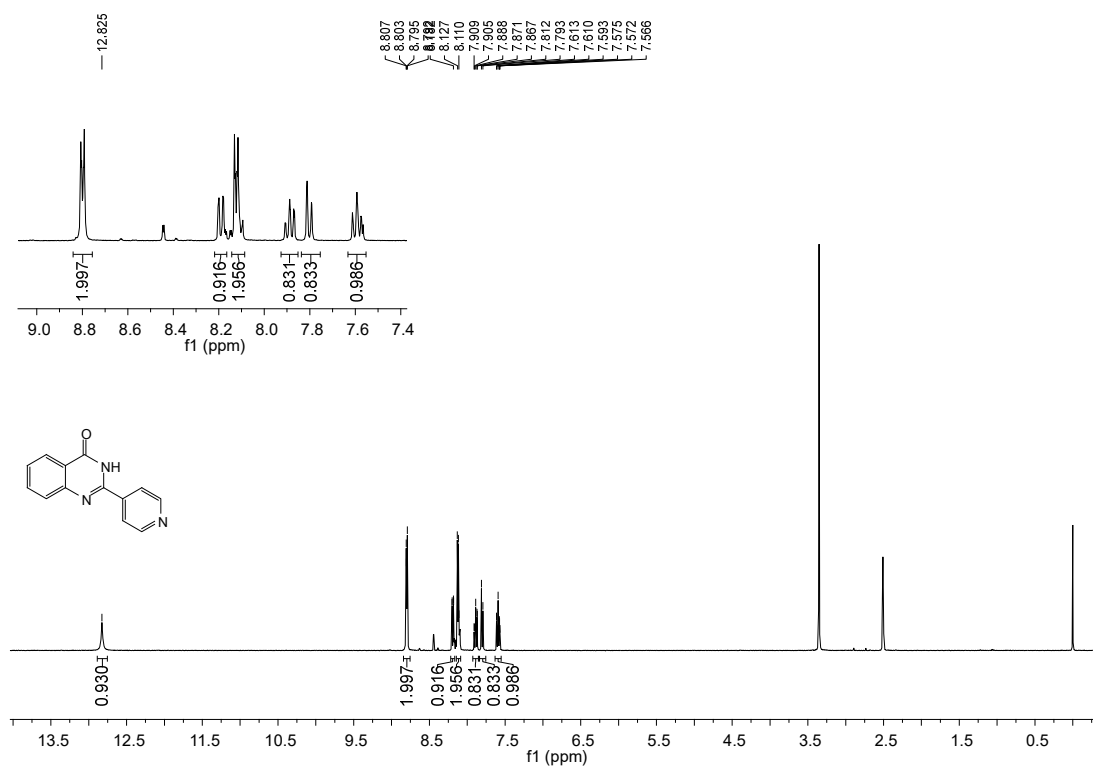

Figure S5. <sup>1</sup>H NMR (400 MHz, *d*<sub>6</sub>-DMSO) of **1**

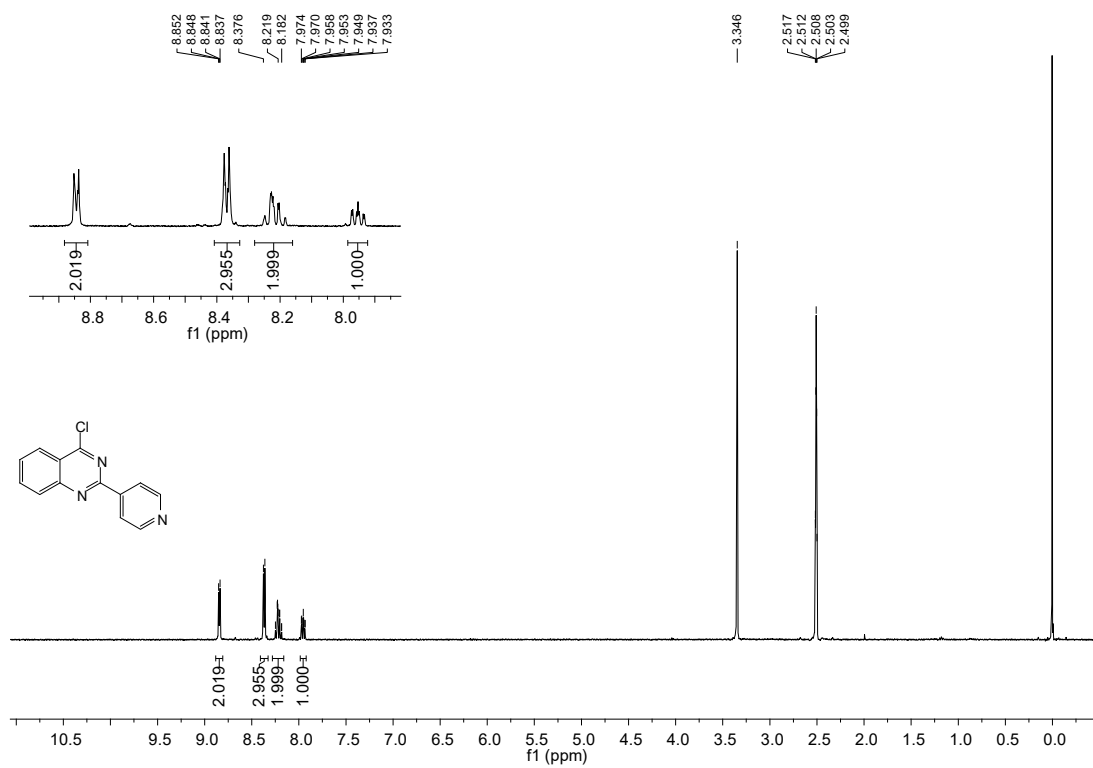

Figure S6. <sup>1</sup>H NMR (400 MHz, *d*<sub>6</sub>-DMSO) of **2**

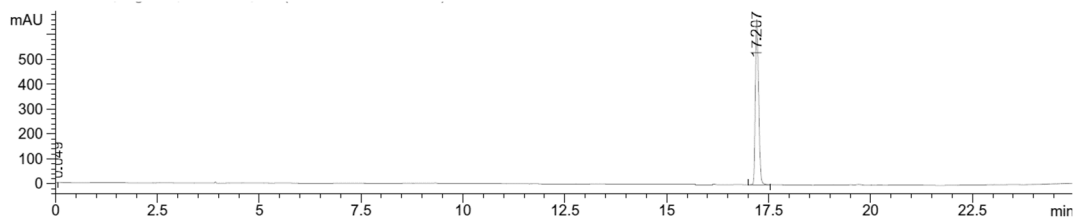

Figure S7. HPLC analysis of **3**

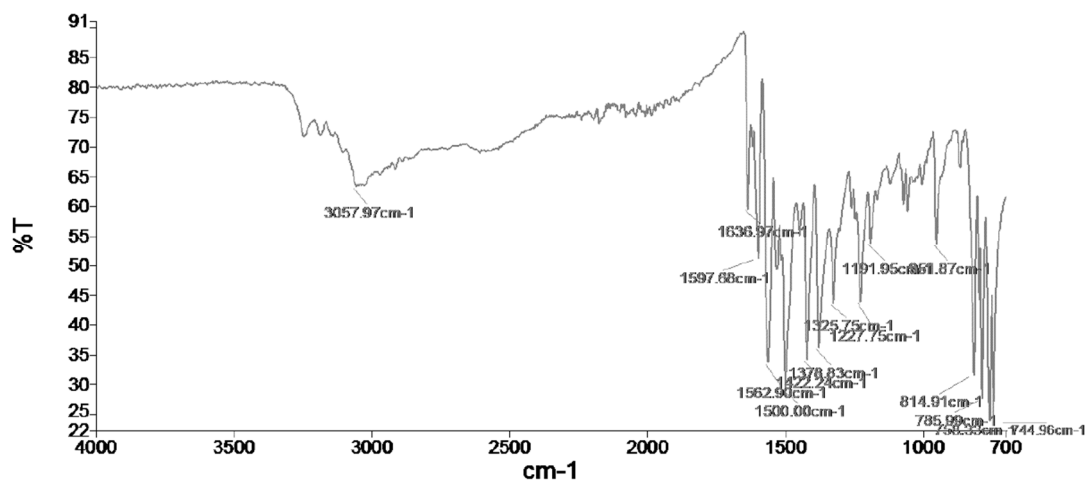

Figure S8. IR spectra of **3**

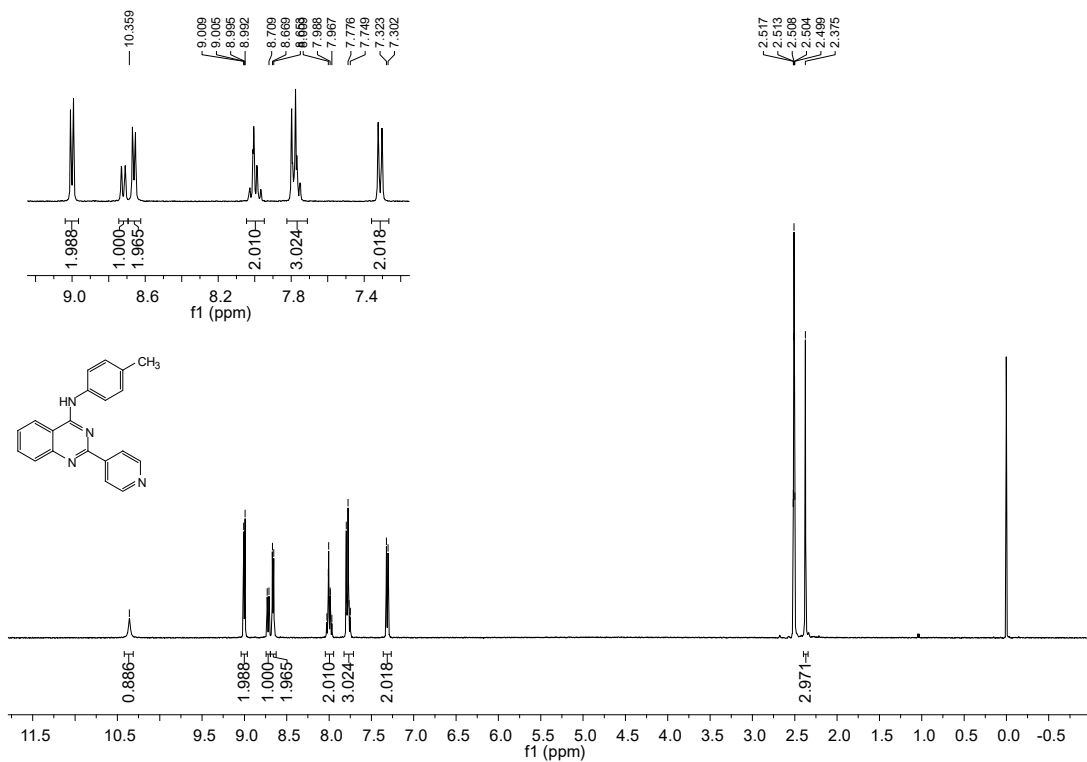

Figure S9. <sup>1</sup>H NMR (400 MHz, d<sub>6</sub>-DMSO) of **3**

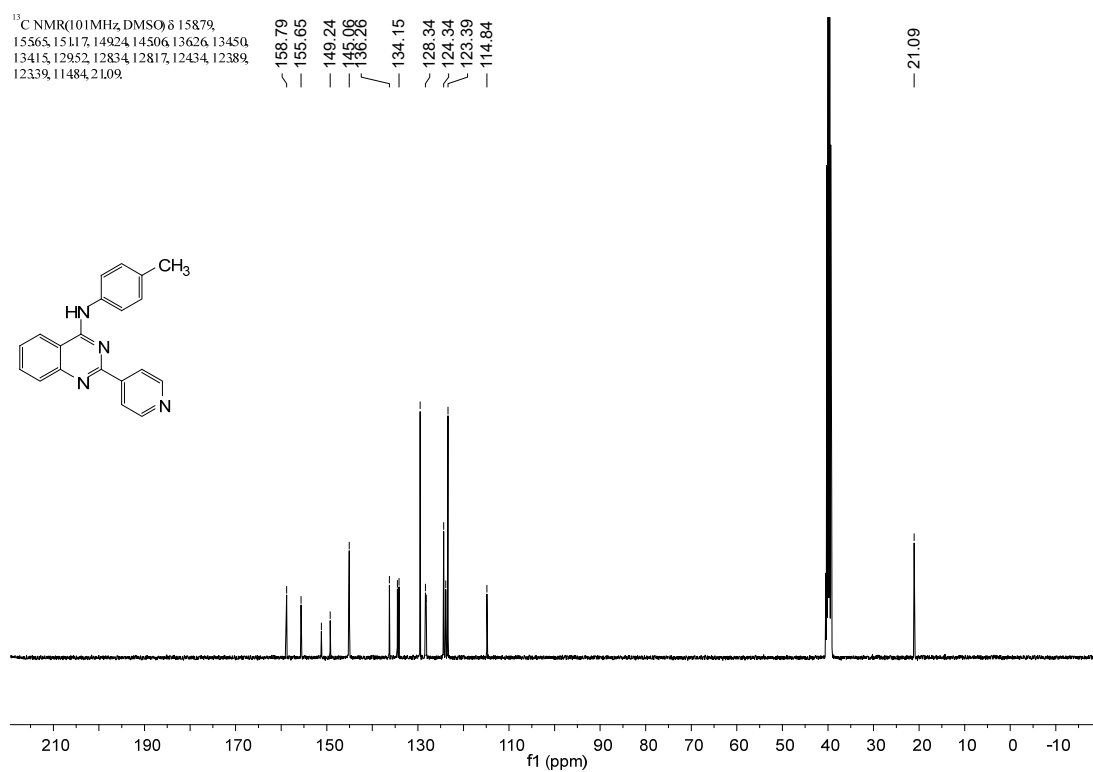

Figure S10. <sup>13</sup>C NMR (101 MHz, *d*<sub>6</sub>-DMSO) of 3

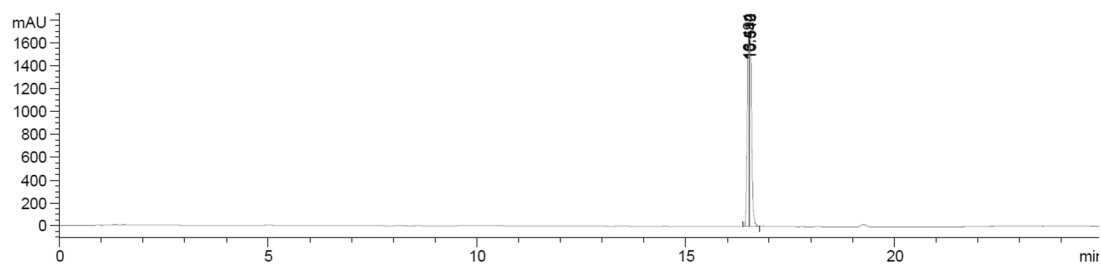

Figure S11. HPLC analysis of 4

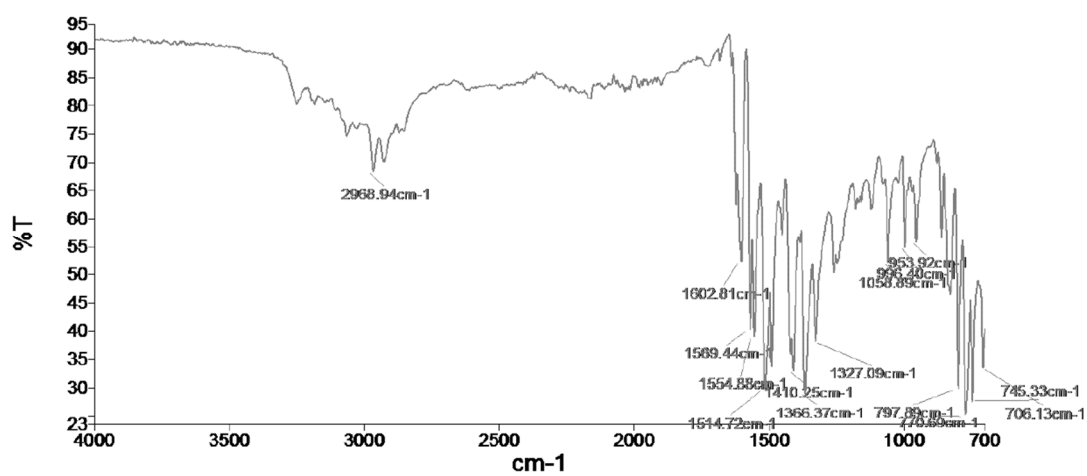

Figure S12. IR spectra of 4

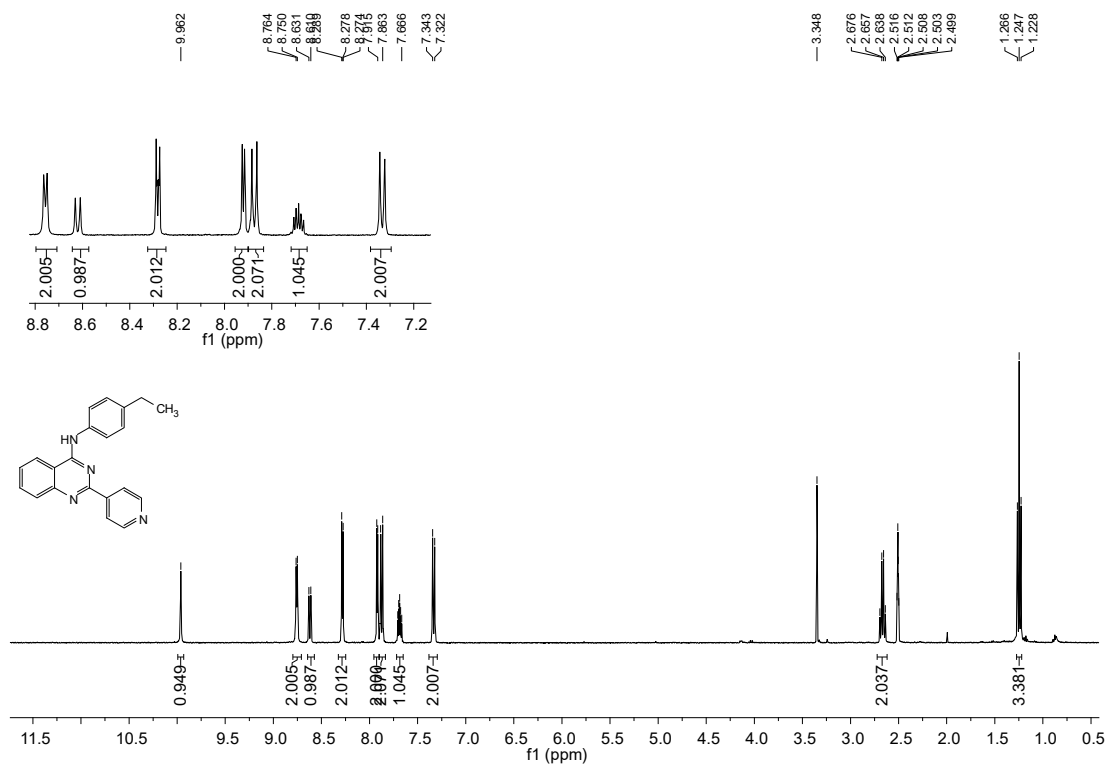

Figure S13. <sup>1</sup>H NMR (400 MHz, *d*<sub>6</sub>-DMSO) of 4

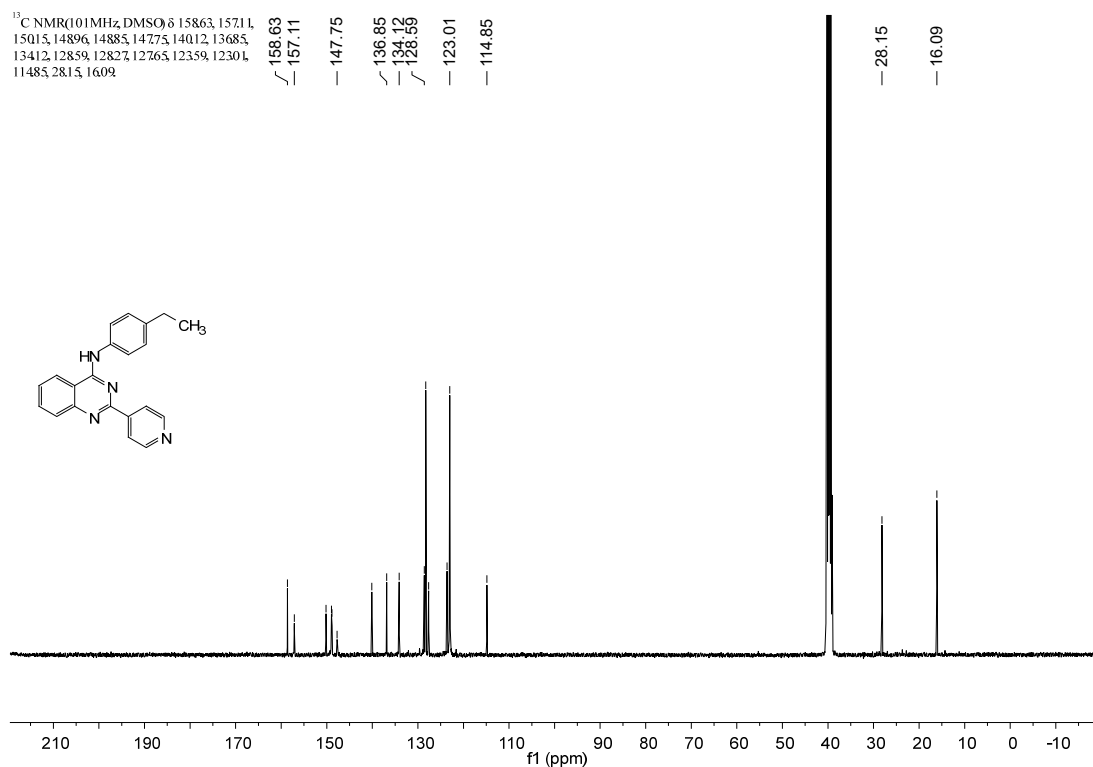

Figure S14. <sup>13</sup>C NMR (101 MHz, *d*<sub>6</sub>-DMSO) of 4

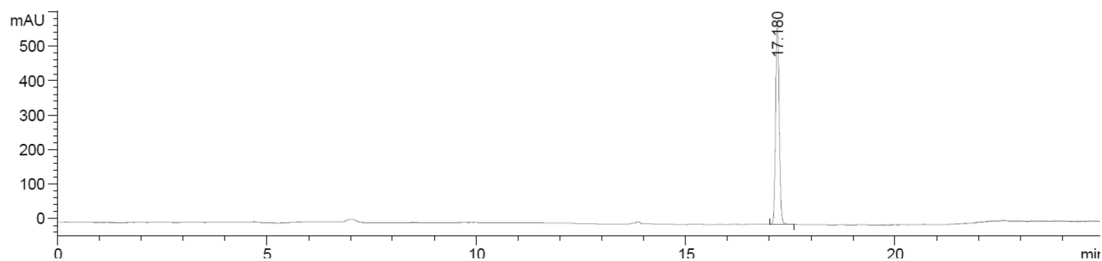

Figure S15. HPLC analysis of **5**

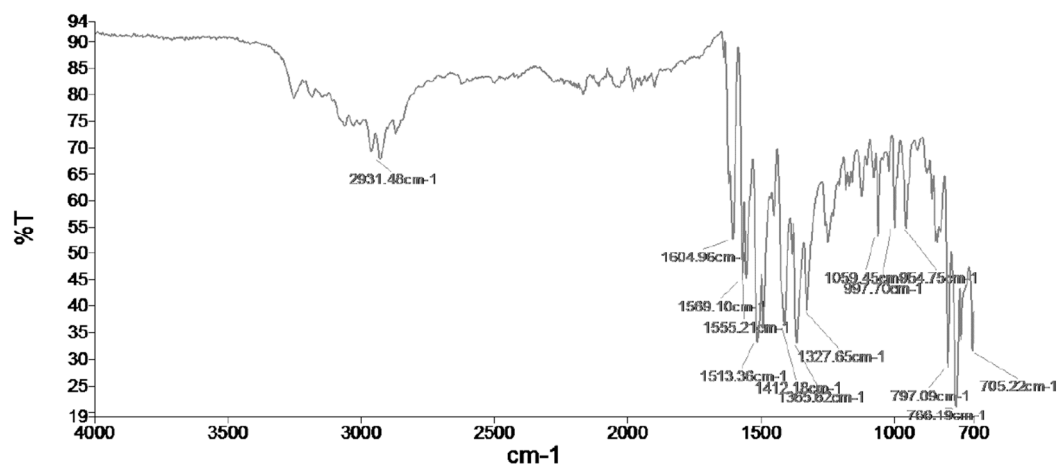

Figure S16. IR spectra of **5**

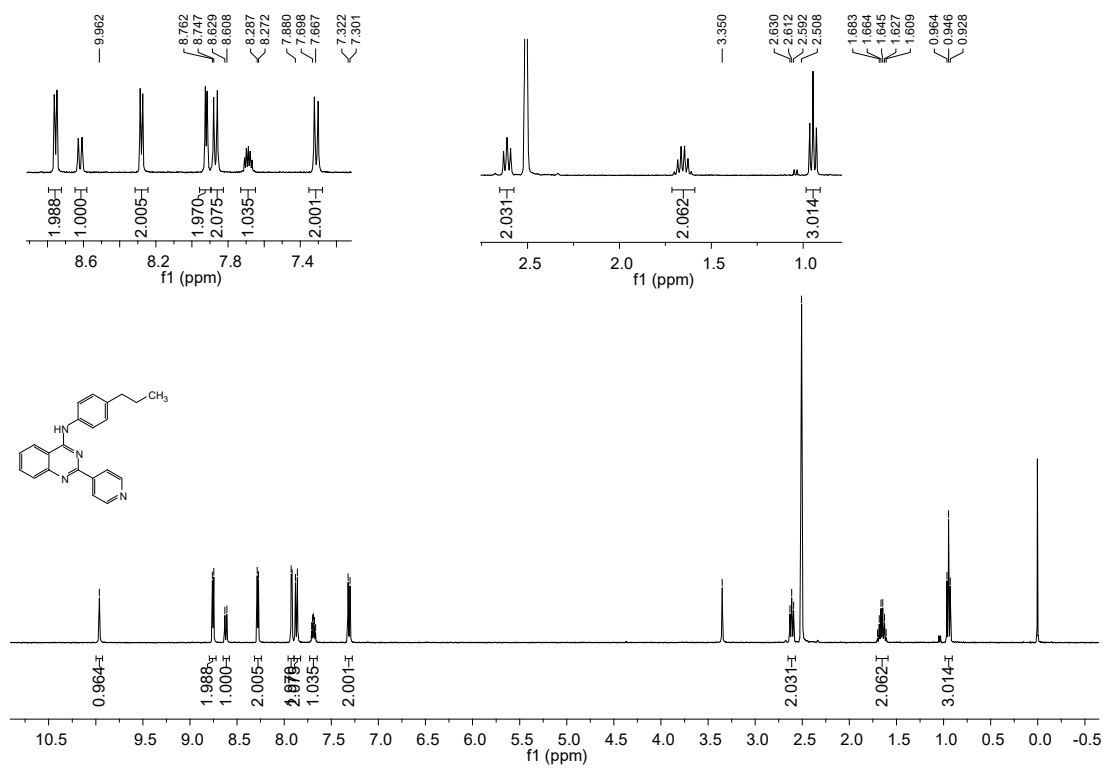

Figure S17. <sup>1</sup>H NMR (400 MHz, d<sub>6</sub>-DMSO) of **5**

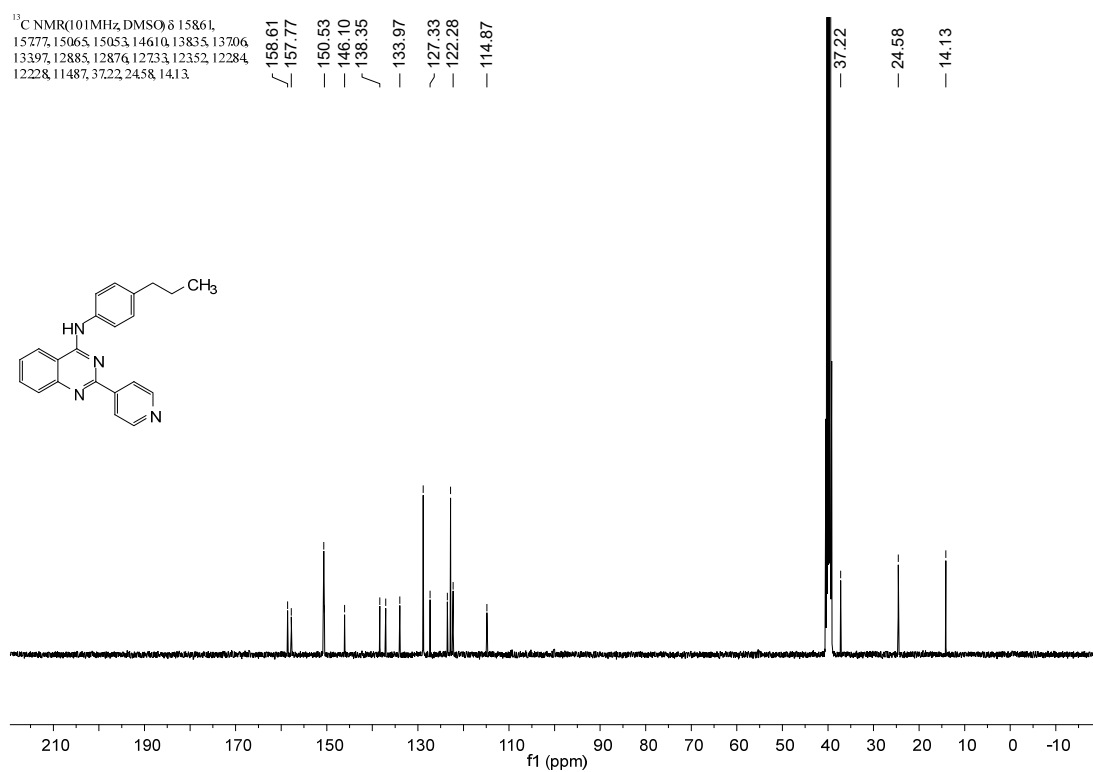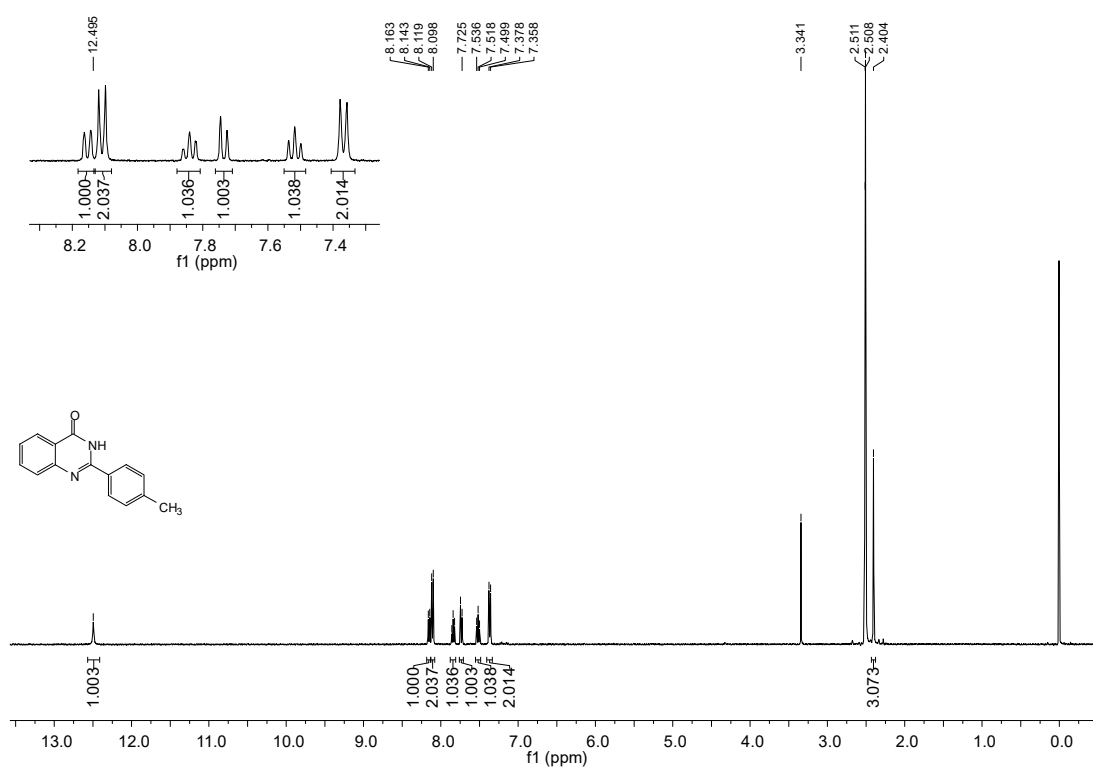



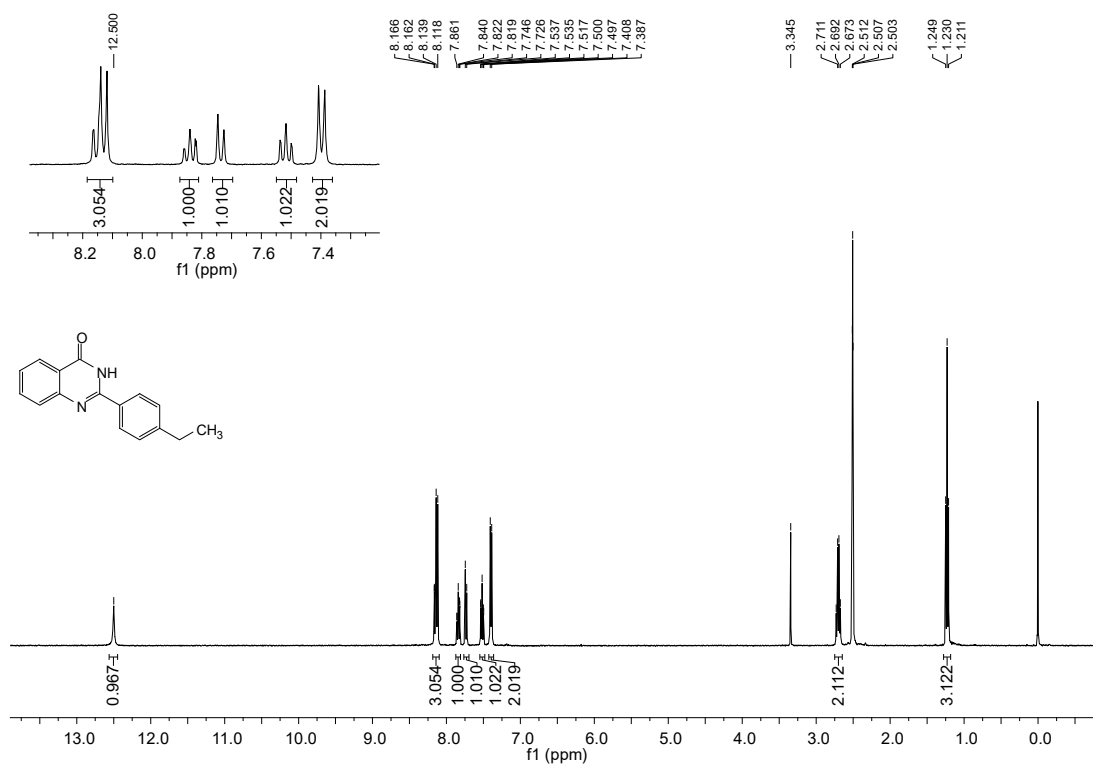

Figure S20. <sup>1</sup>H NMR (400 MHz, *d*<sub>6</sub>-DMSO) of 7

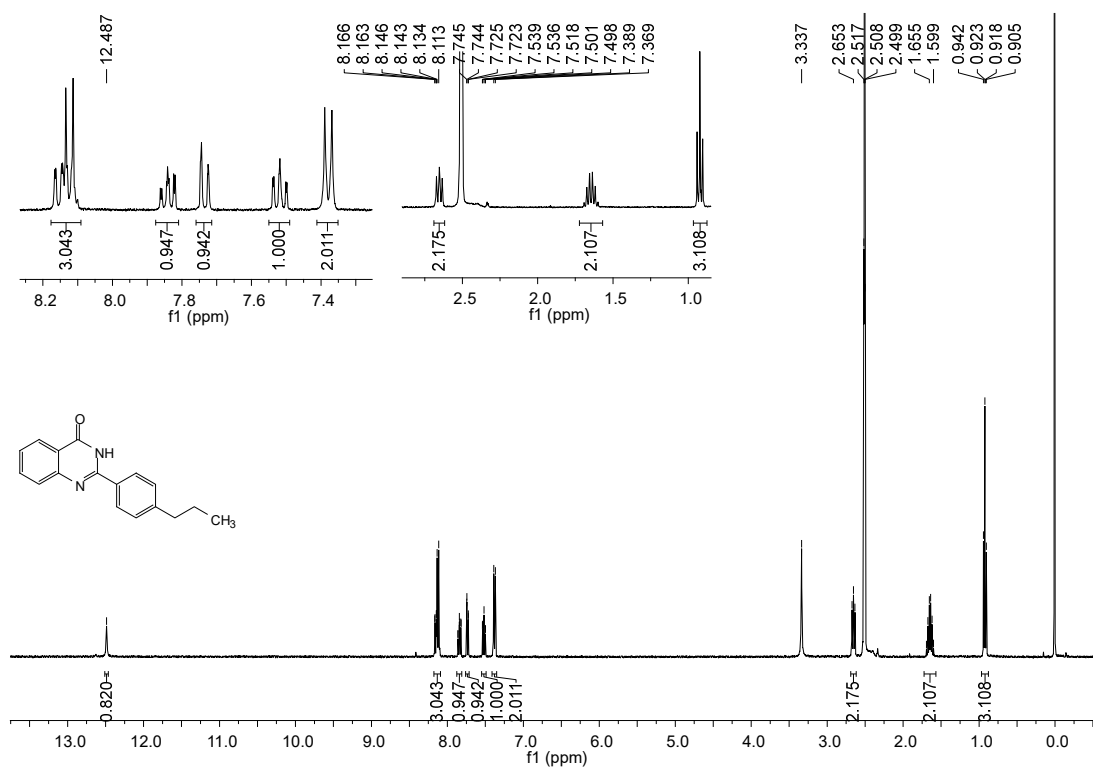

Figure S21. <sup>1</sup>H NMR (400 MHz, *d*<sub>6</sub>-DMSO) of 8

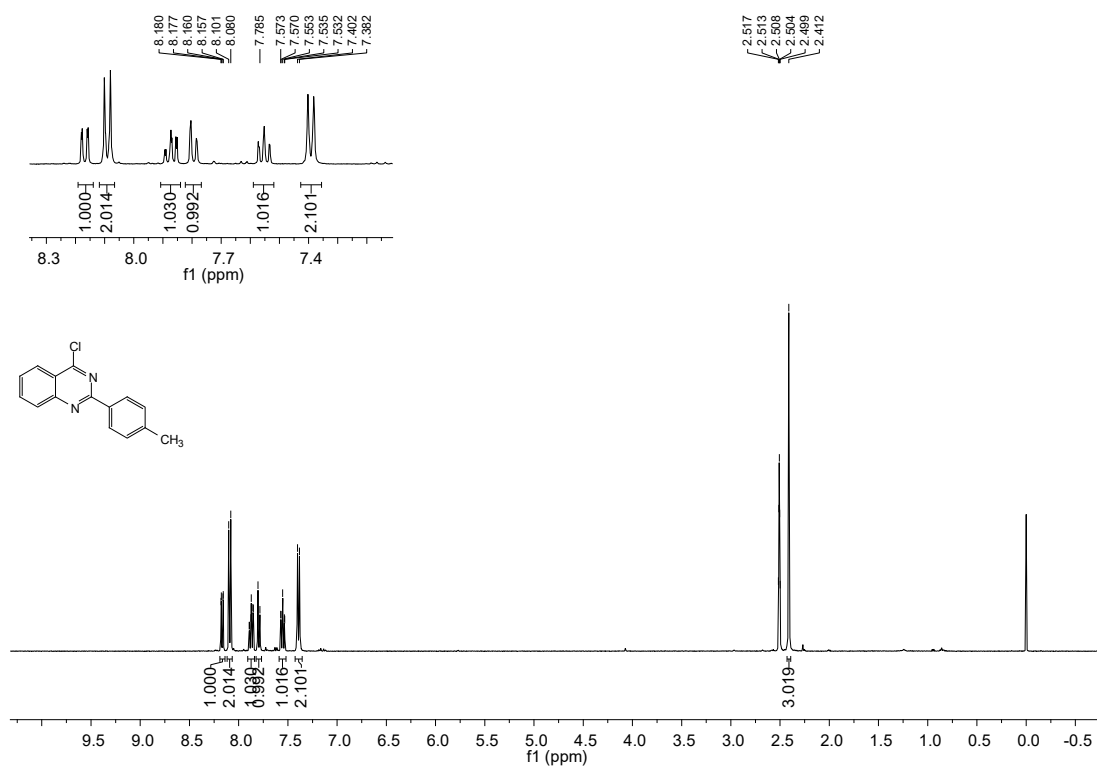

Figure S22. <sup>1</sup>H NMR (400 MHz, *d*<sub>6</sub>-DMSO) of **9**

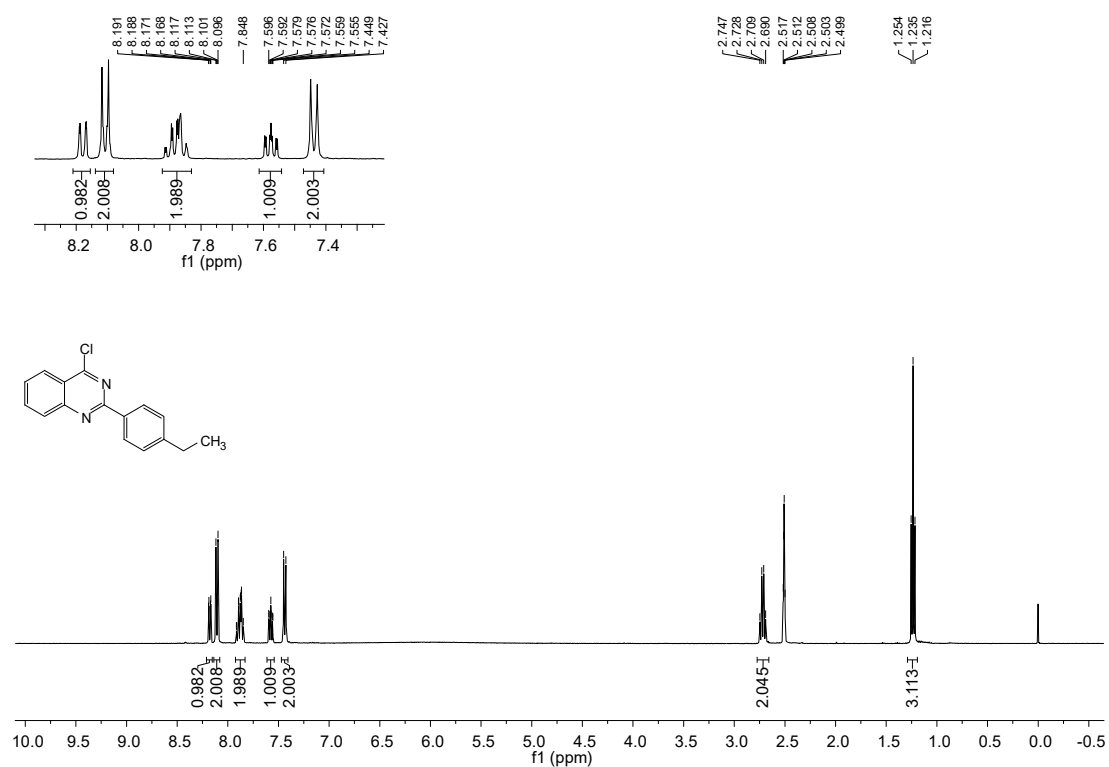

Figure S23. <sup>1</sup>H NMR (400 MHz, *d*<sub>6</sub>-DMSO) of **10**

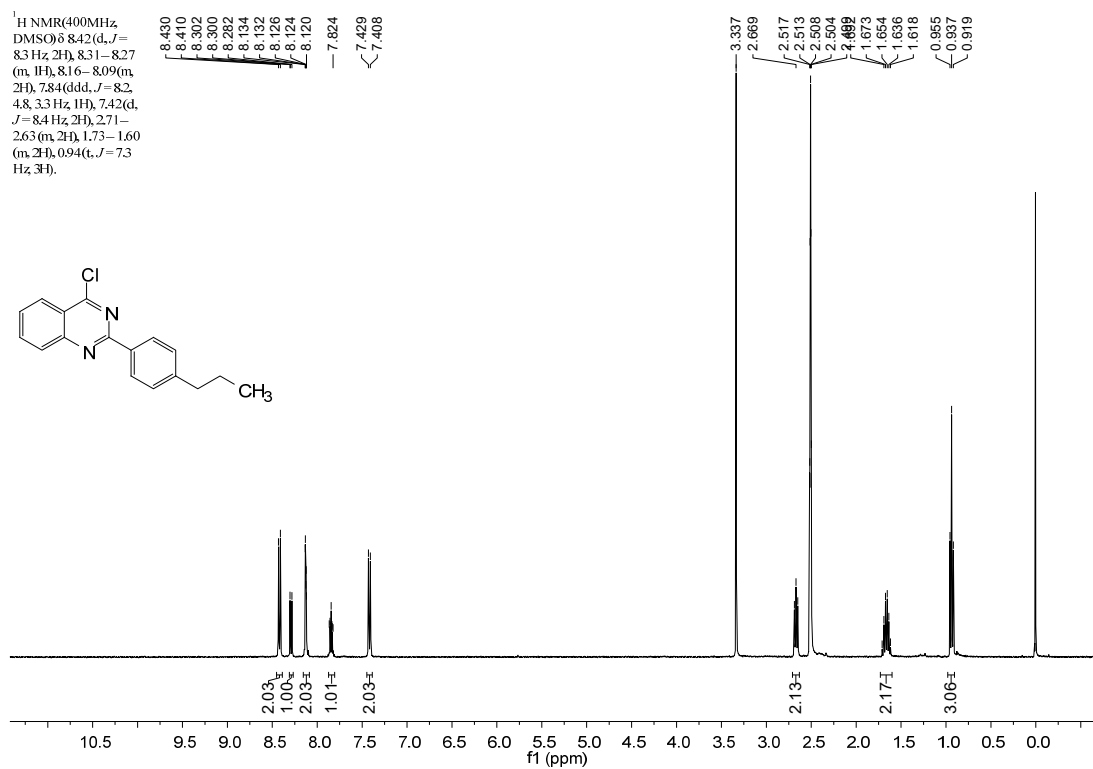

Figure S24. <sup>1</sup>H NMR (400 MHz, *d*<sub>6</sub>-DMSO) of **11**

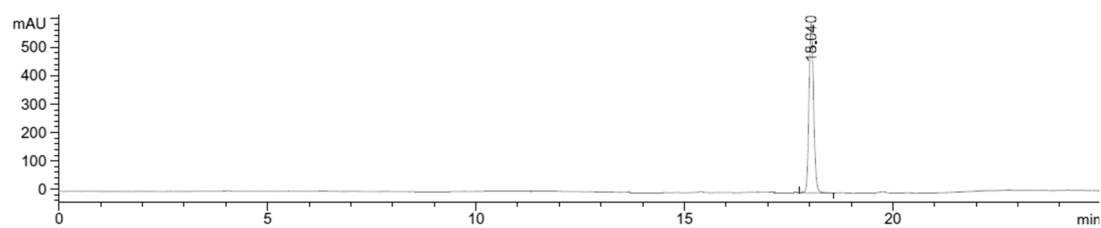

Figure S25. HPLC analysis of **12**

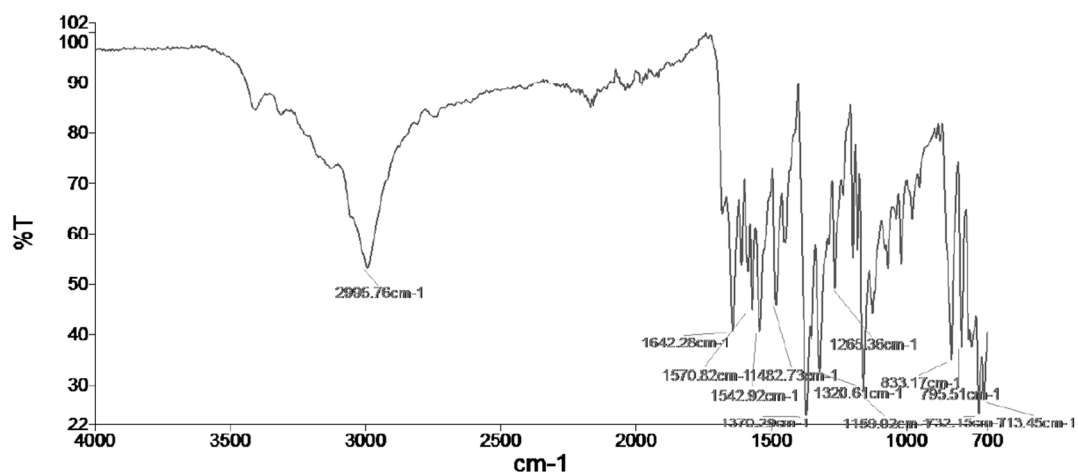

Figure S26. IR spectra of **12**

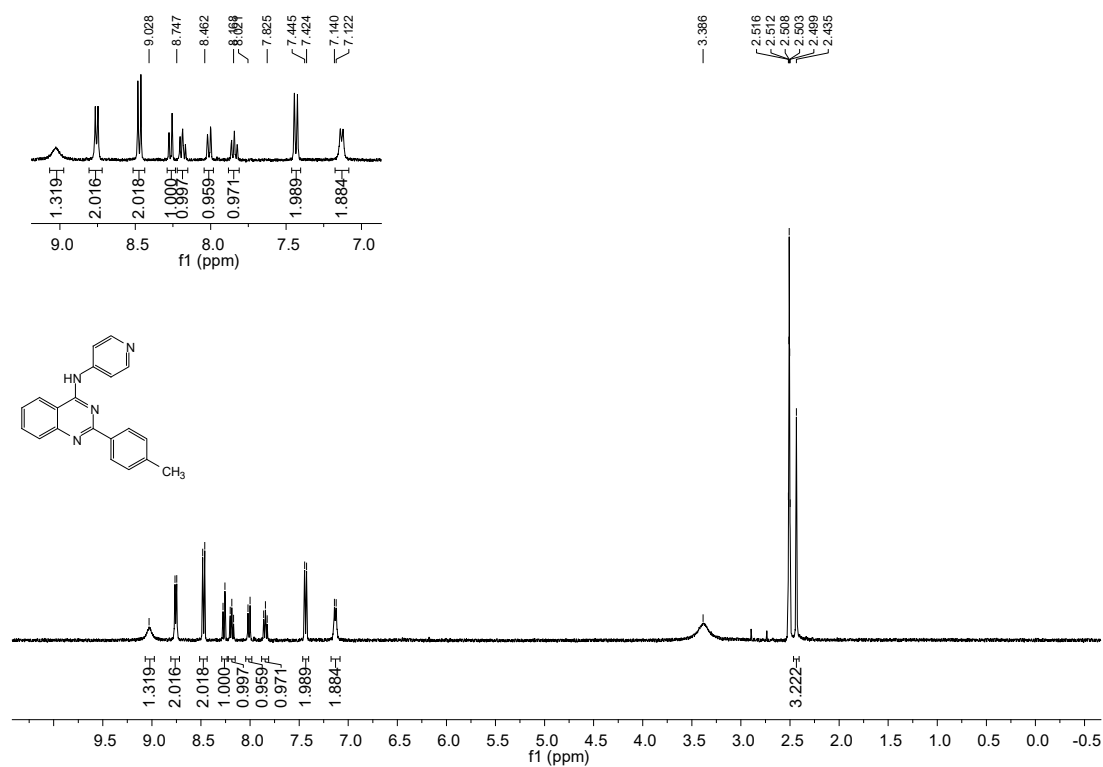

Figure S27. <sup>1</sup>H NMR (400 MHz, *d*<sub>6</sub>-DMSO) of **12**

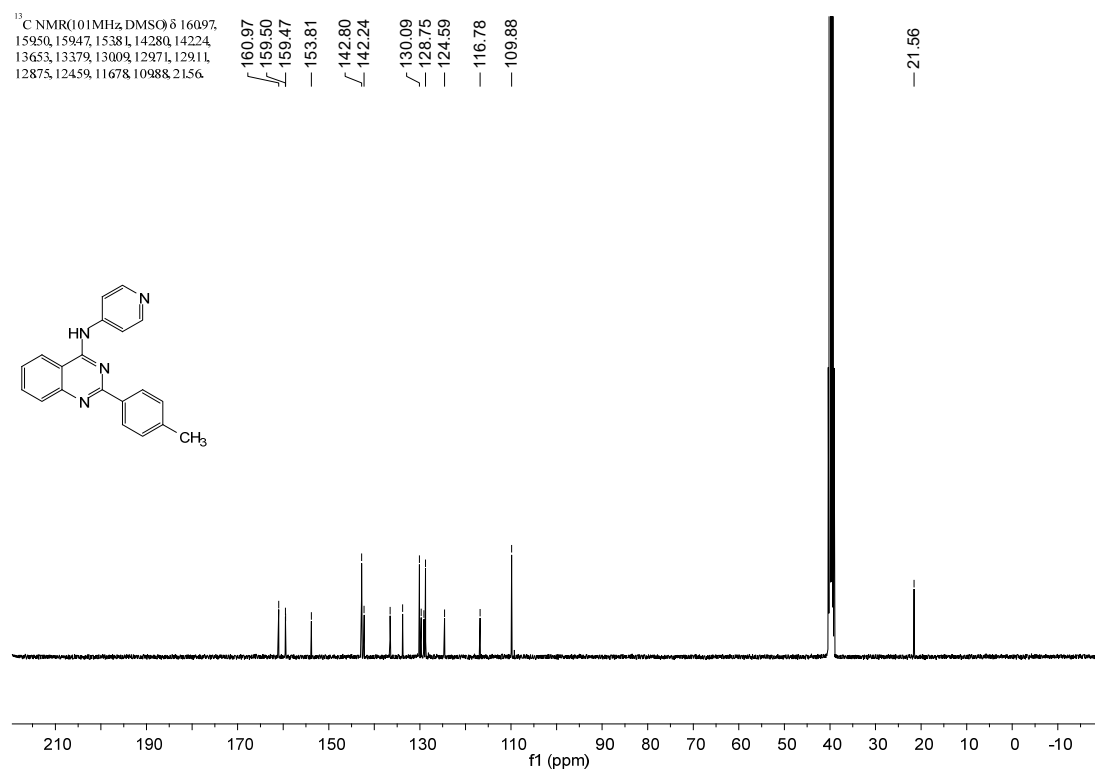

Figure S28. <sup>13</sup>C NMR (101 MHz, *d*<sub>6</sub>-DMSO) of **12**

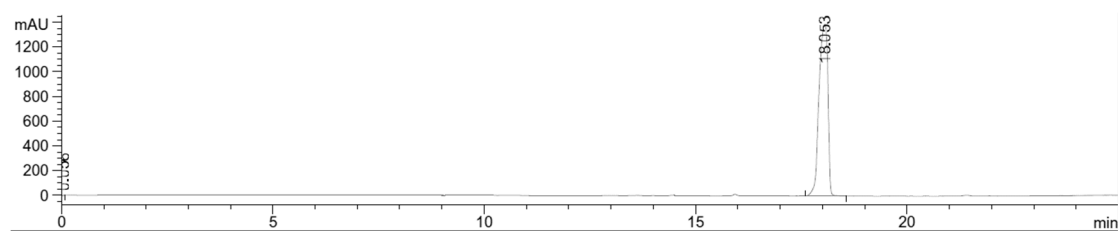

Figure S29. HPLC analysis of **13**

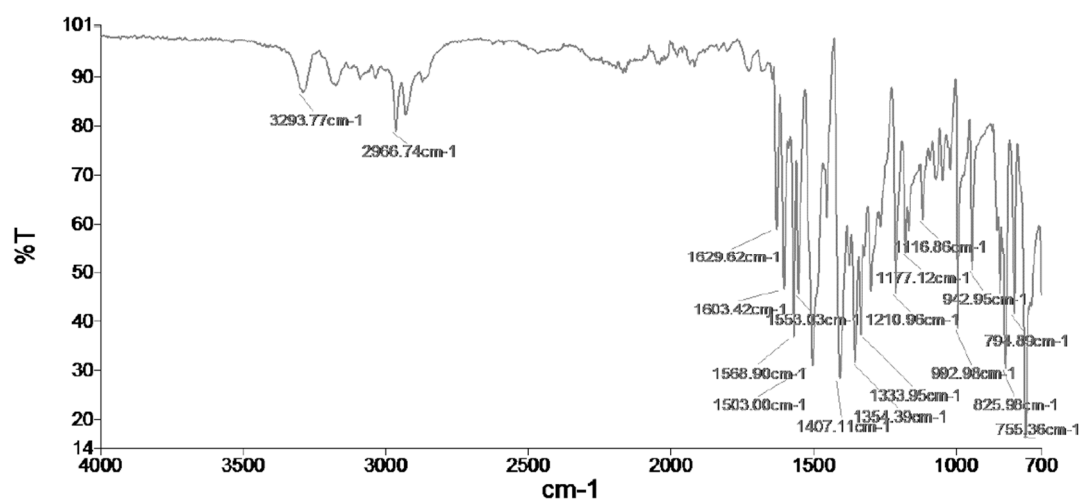

Figure S30. IR spectra of **13**

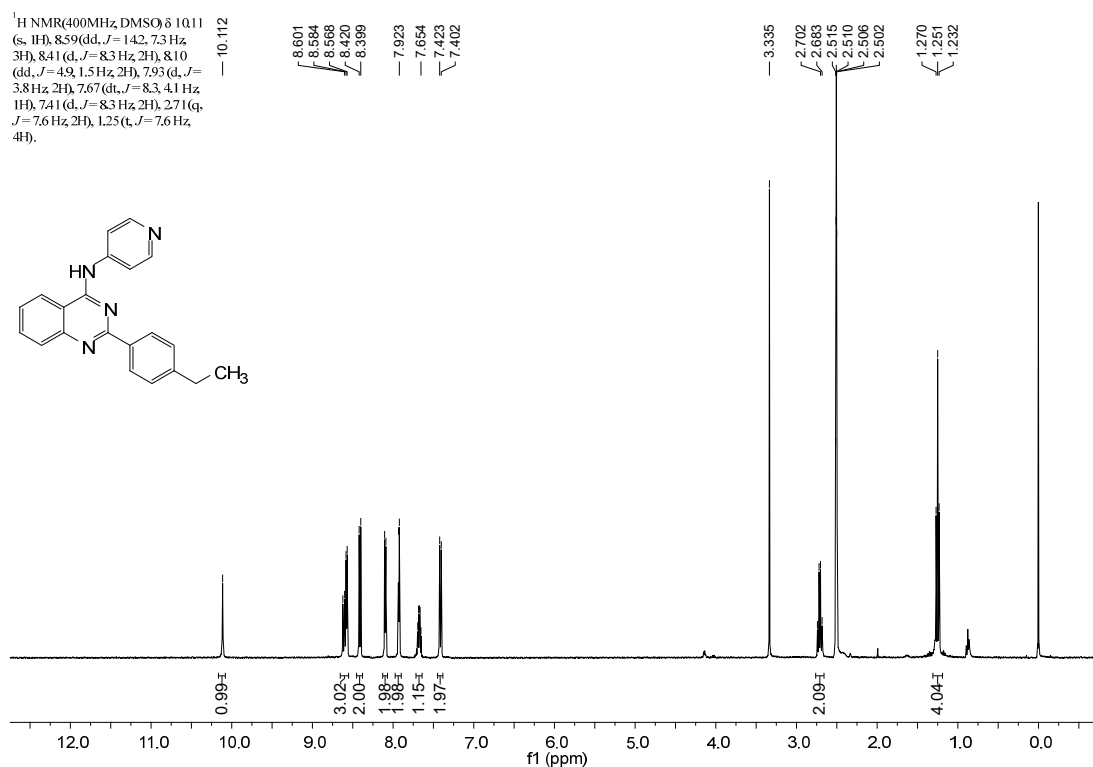

Figure S31. <sup>1</sup>H NMR (400 MHz, *d*<sub>6</sub>-DMSO) of **13**

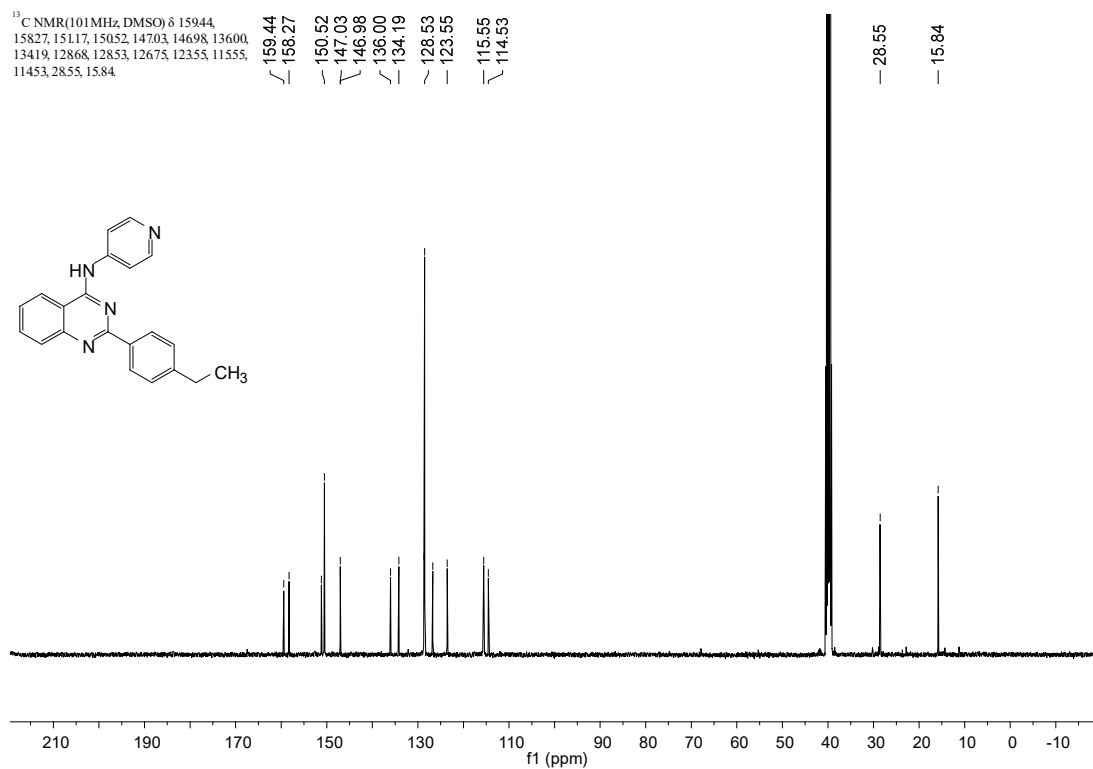

Figure S32. <sup>13</sup>C NMR (101 MHz, *d*<sub>6</sub>-DMSO) of **13**

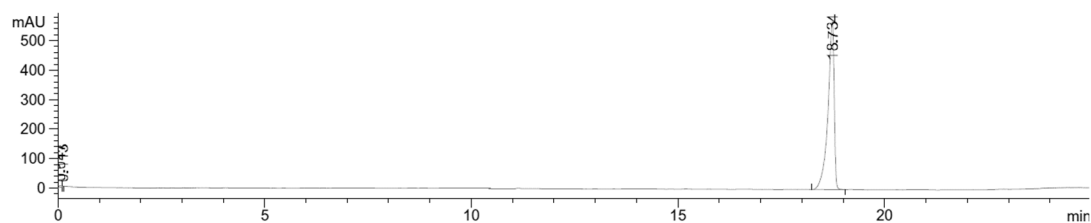

Figure S33. HPLC analysis of **14**

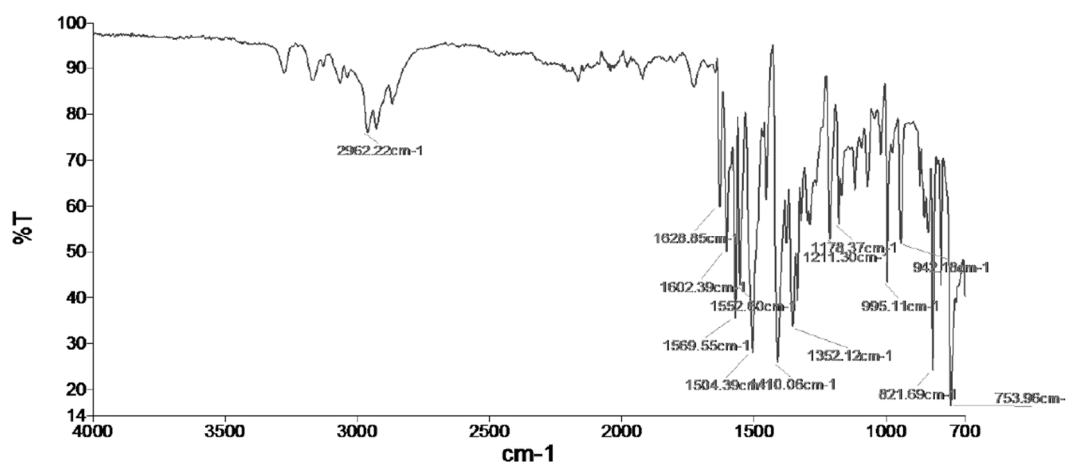

Figure S34. IR spectra of **14**

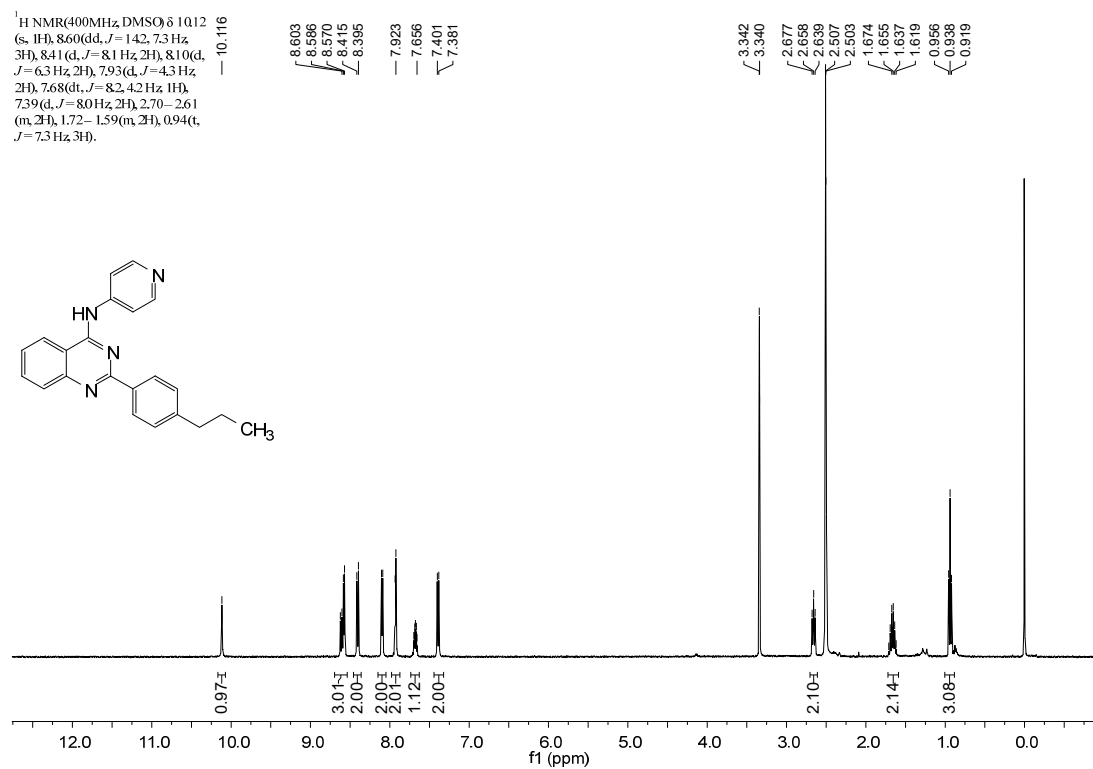

Figure S35. <sup>1</sup>H NMR (400 MHz, *d*<sub>6</sub>-DMSO) of **14**

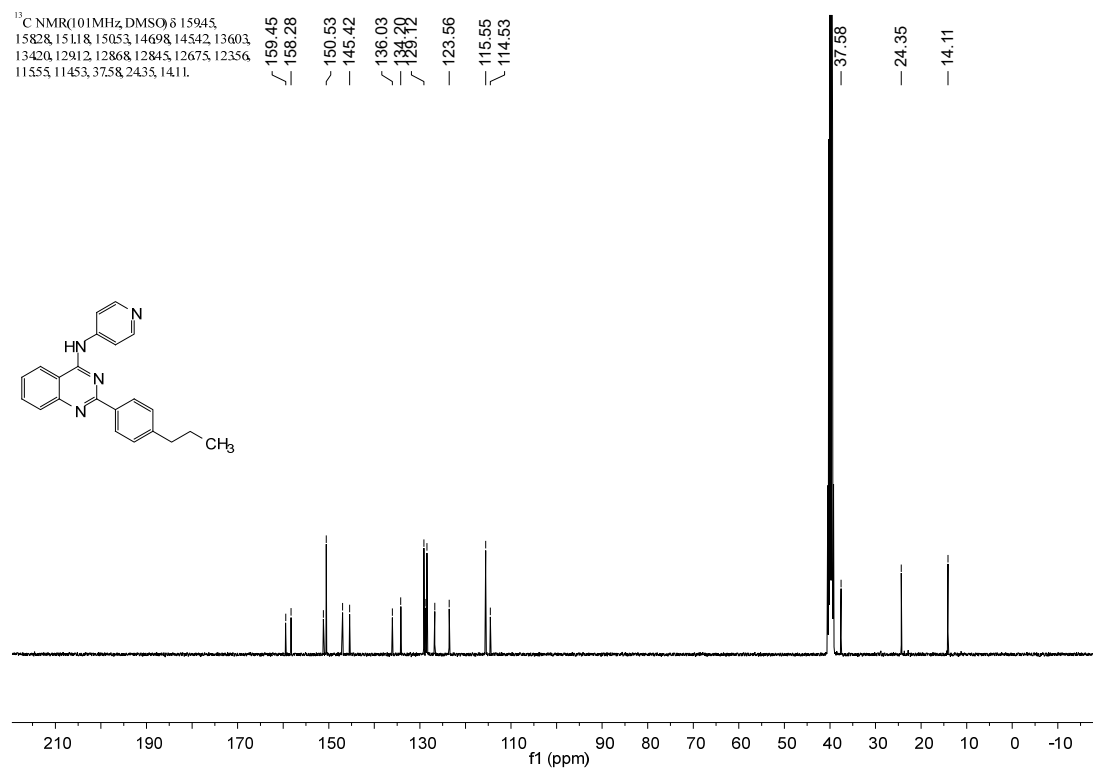

Figure S36. <sup>13</sup>C NMR (101 MHz, *d*<sub>6</sub>-DMSO) of **14**





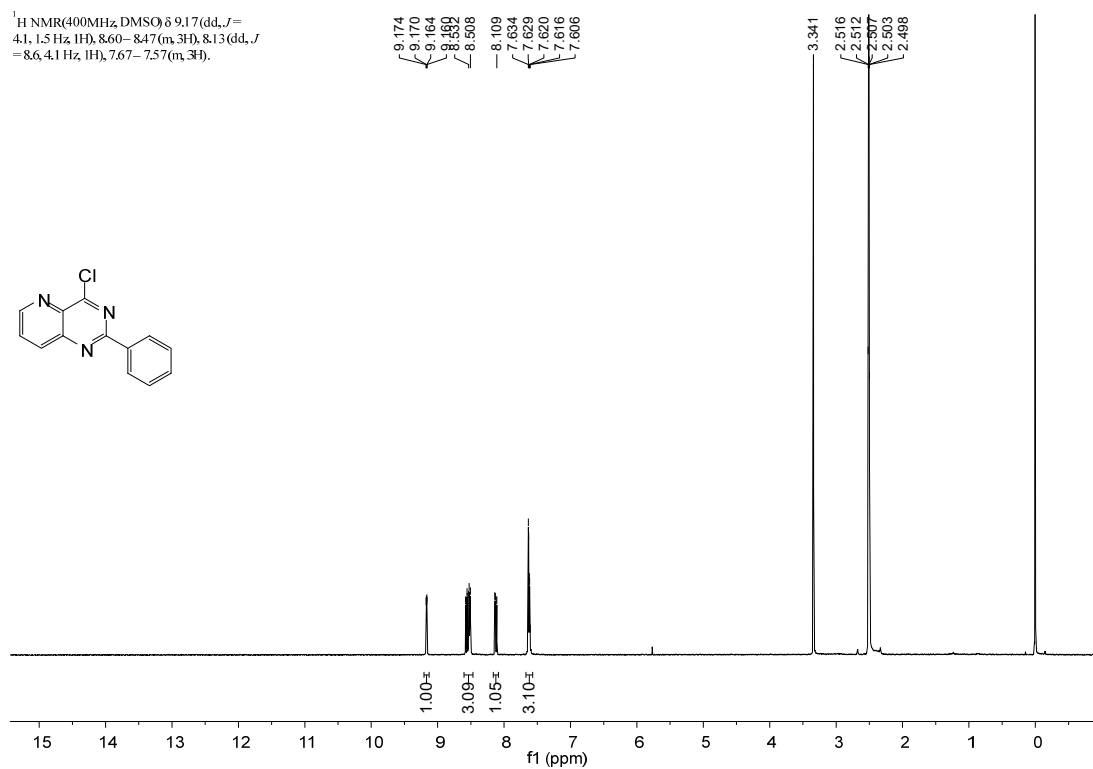

Figure S39. <sup>1</sup>H NMR (400 MHz, *d*<sub>6</sub>-DMSO) of 17

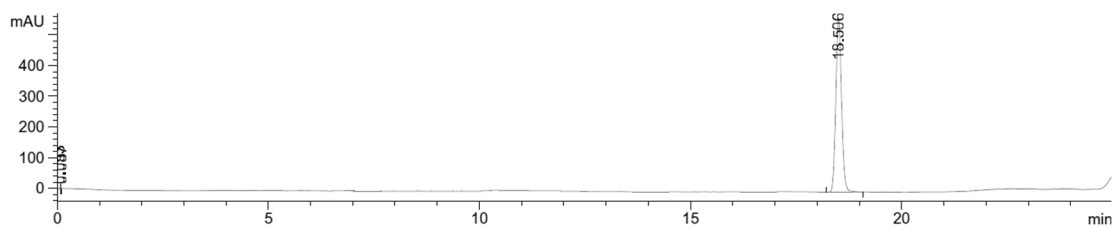

Figure S40. HPLC analysis of 18

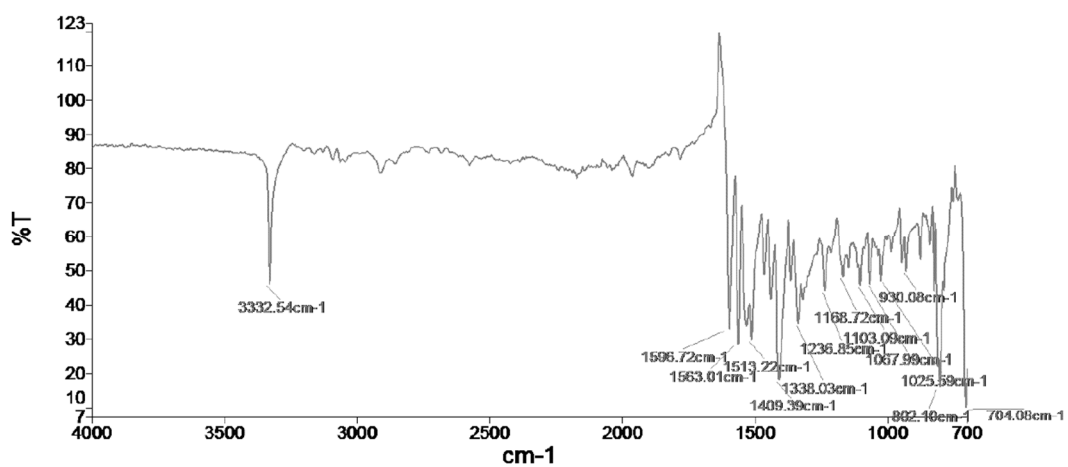

Figure S41. IR spectra of 18

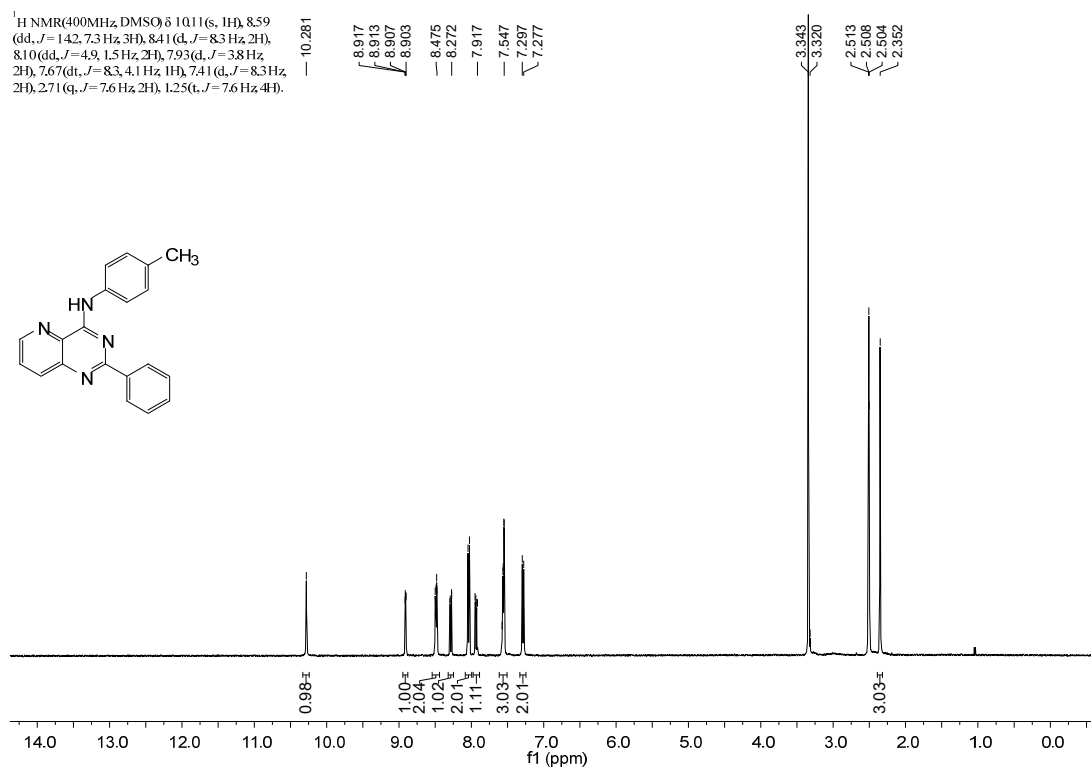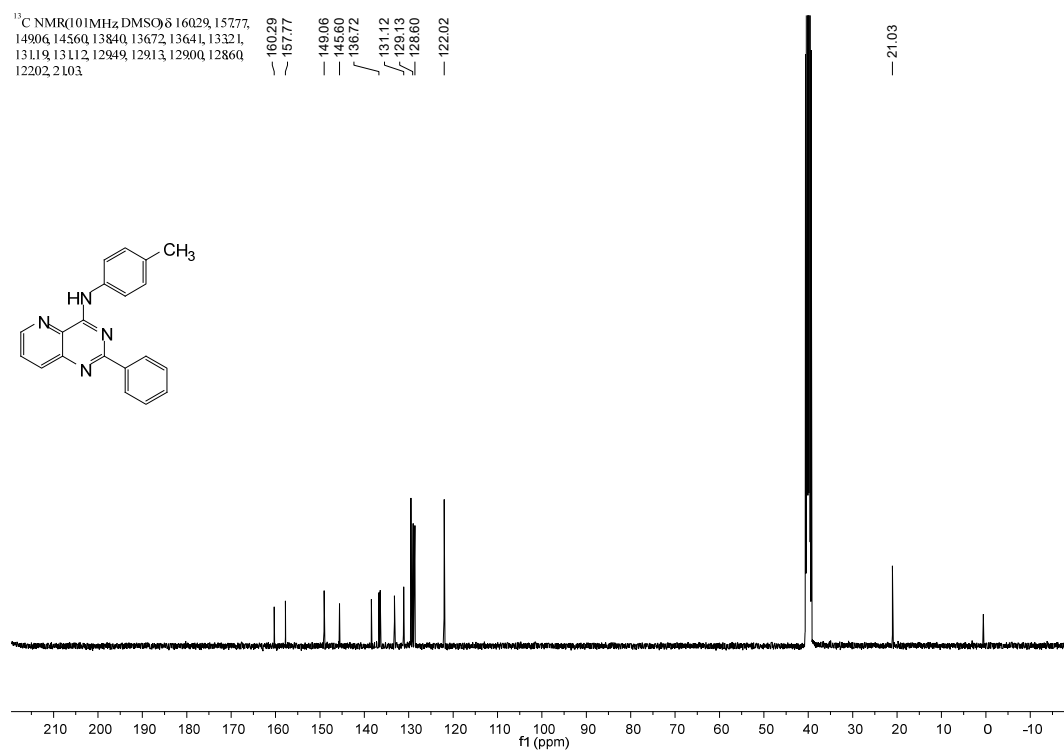

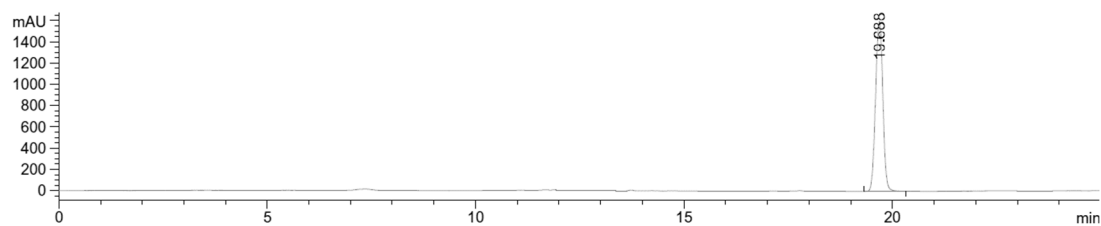

Figure S44. HPLC analysis of **19**

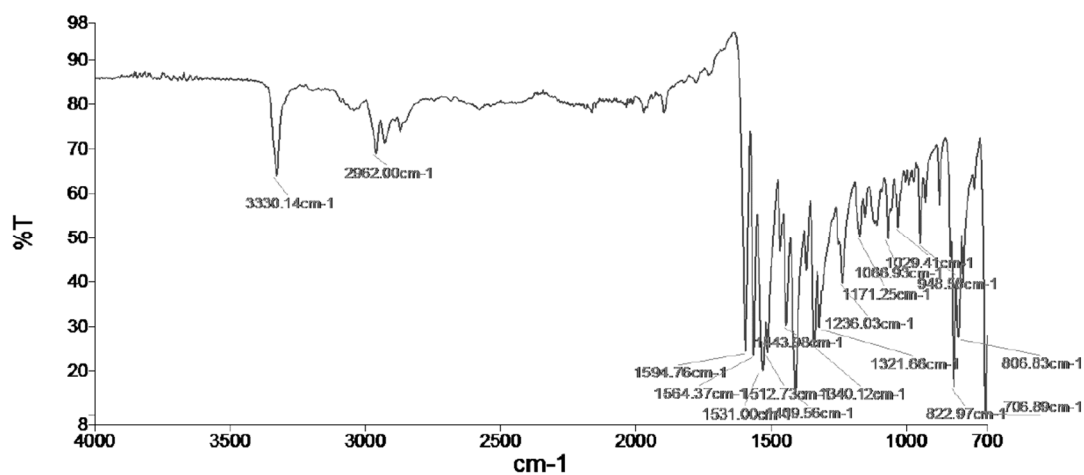

Figure S45. IR spectra of **19**

<sup>1</sup>H NMR (400 MHz, DMSO)  $\delta$  10.28 (s, 1H), 8.91 (dd,  $J$  = 4.2, 1.5 Hz, 1H), 8.55–8.45 (m, 2H), 8.28 (dd,  $J$  = 8.5, 1.5 Hz, 1H), 8.07 (d,  $J$  = 8.5 Hz, 2H), 7.93 (dd,  $J$  = 8.5, 4.2 Hz, 1H), 7.61–7.51 (m, 3H), 7.32 (d,  $J$  = 8.5 Hz, 2H), 2.65 (q,  $J$  = 7.5 Hz, 2H), 1.23 (t,  $J$  = 7.6 Hz, 3H).

8.916

8.912

8.905

8.901

8.479

8.083

7.915

7.548

7.326

7.304

3.344

2.516

2.511

2.507

2.502

2.498

1.252

1.233

1.214

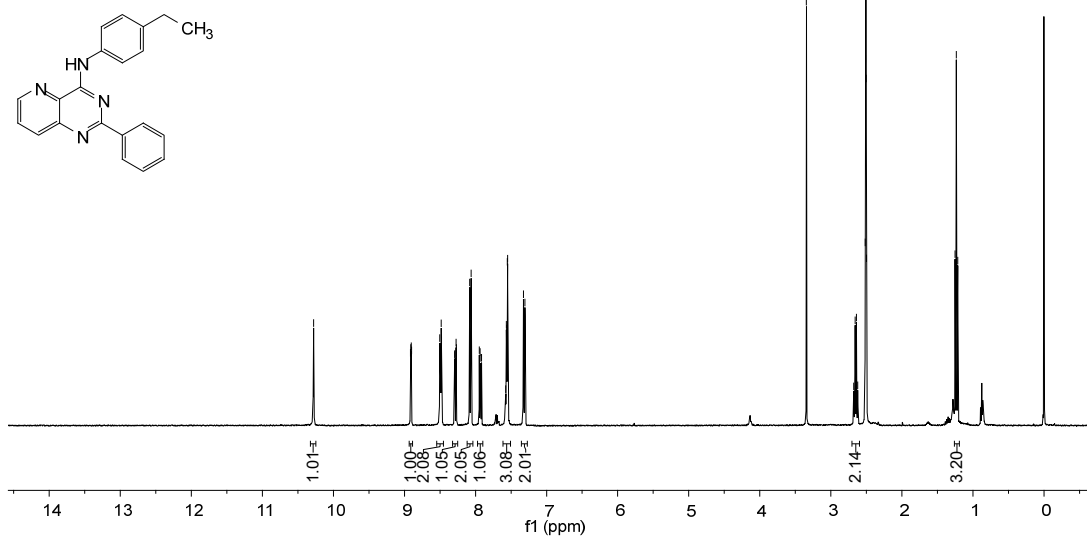

Figure S46. <sup>1</sup>H NMR (400 MHz, d<sub>6</sub>-DMSO) of **19**

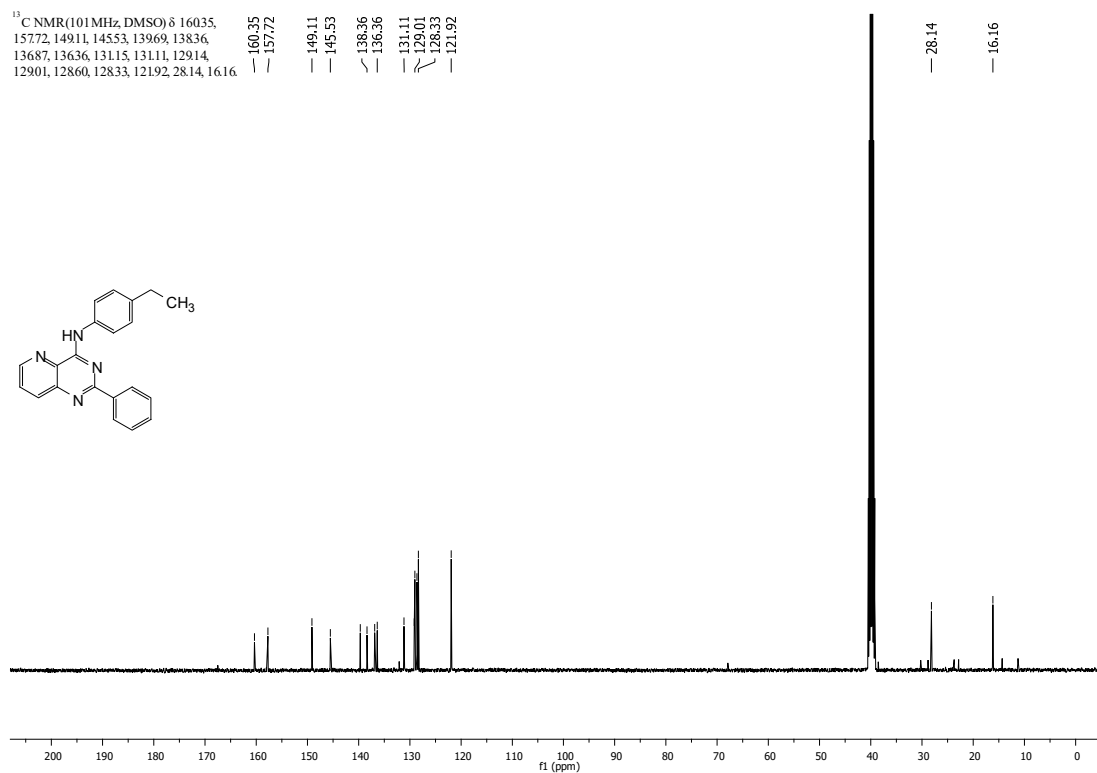

Figure S47. <sup>13</sup>C NMR (101 MHz, *d*<sub>6</sub>-DMSO) of **19**

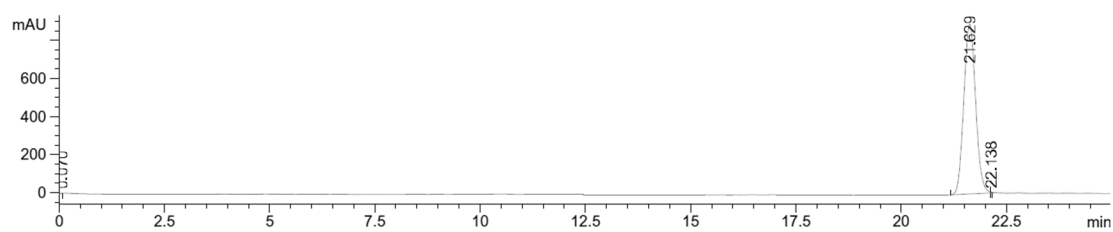

Figure S48. HPLC analysis of **20**

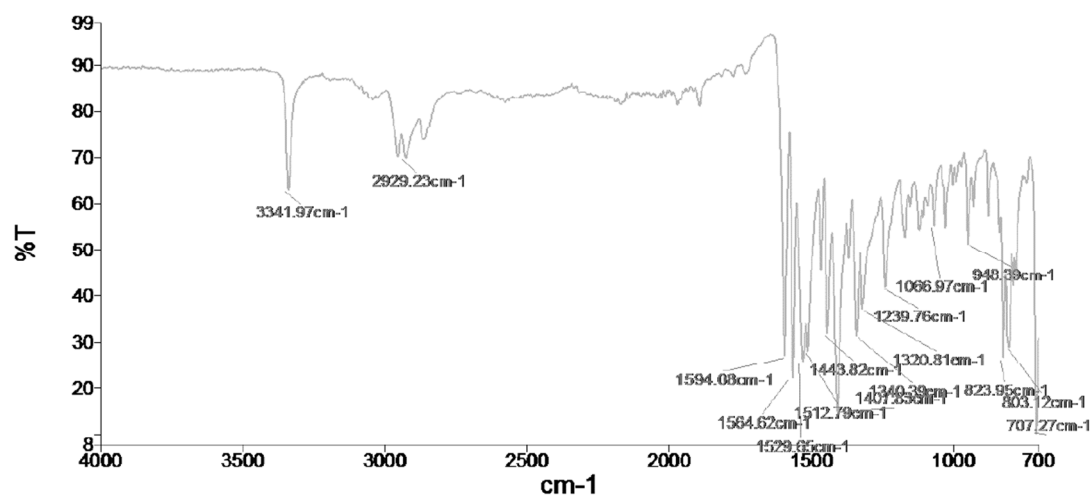

Figure S49. IR spectra of **20**

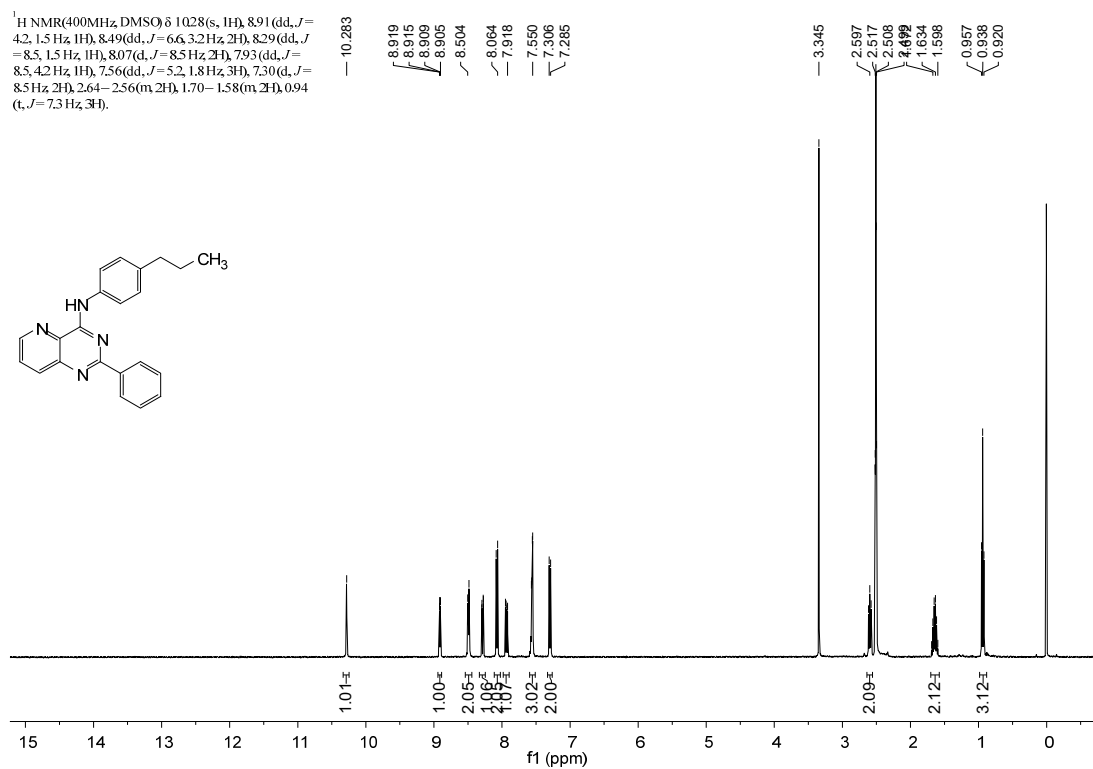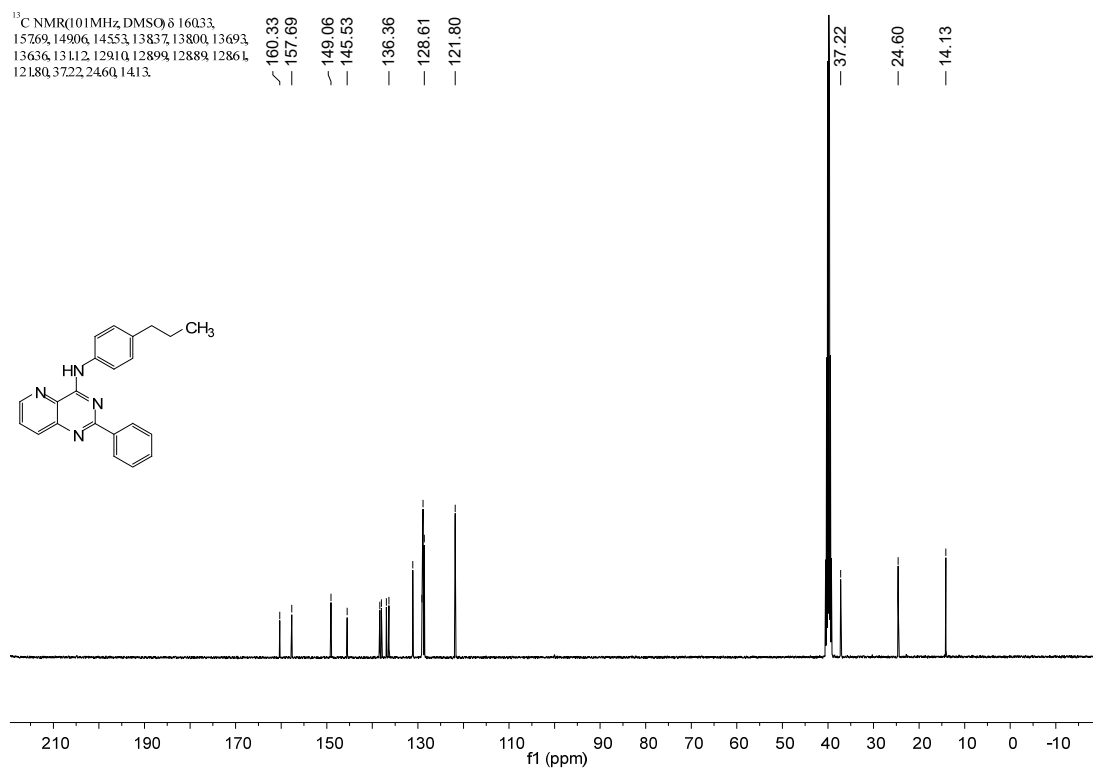

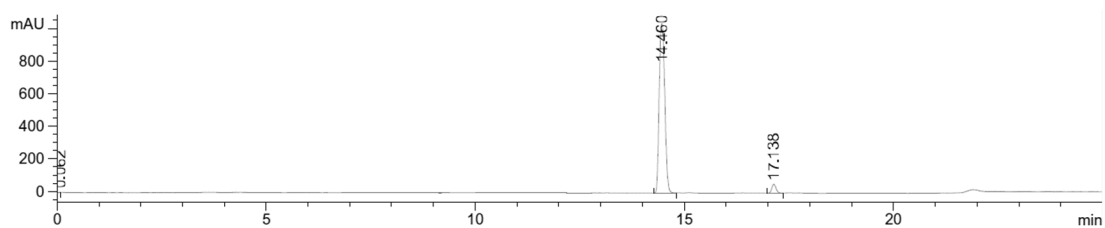

Figure S52. HPLC analysis of **21**

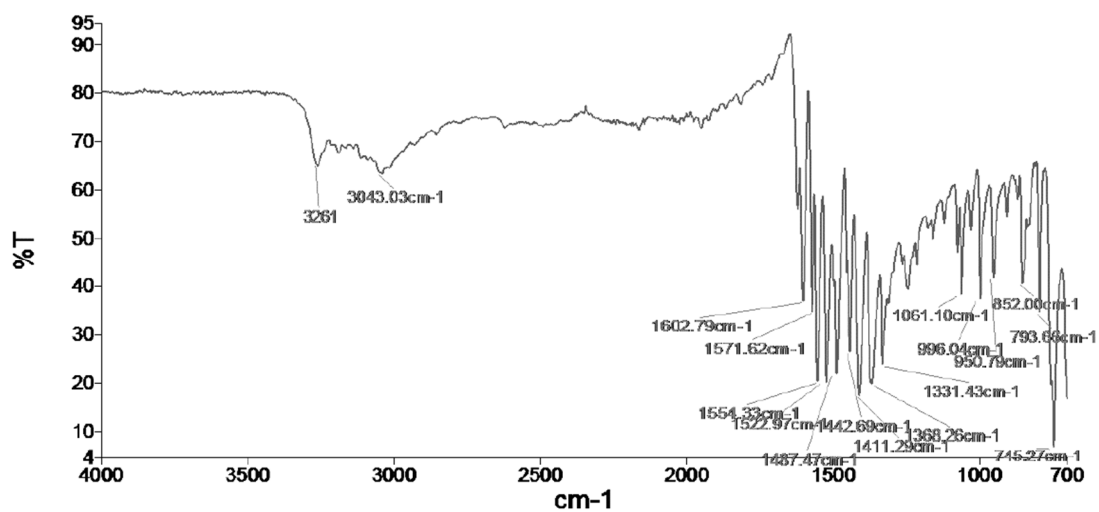

Figure S53. IR spectra of **21**

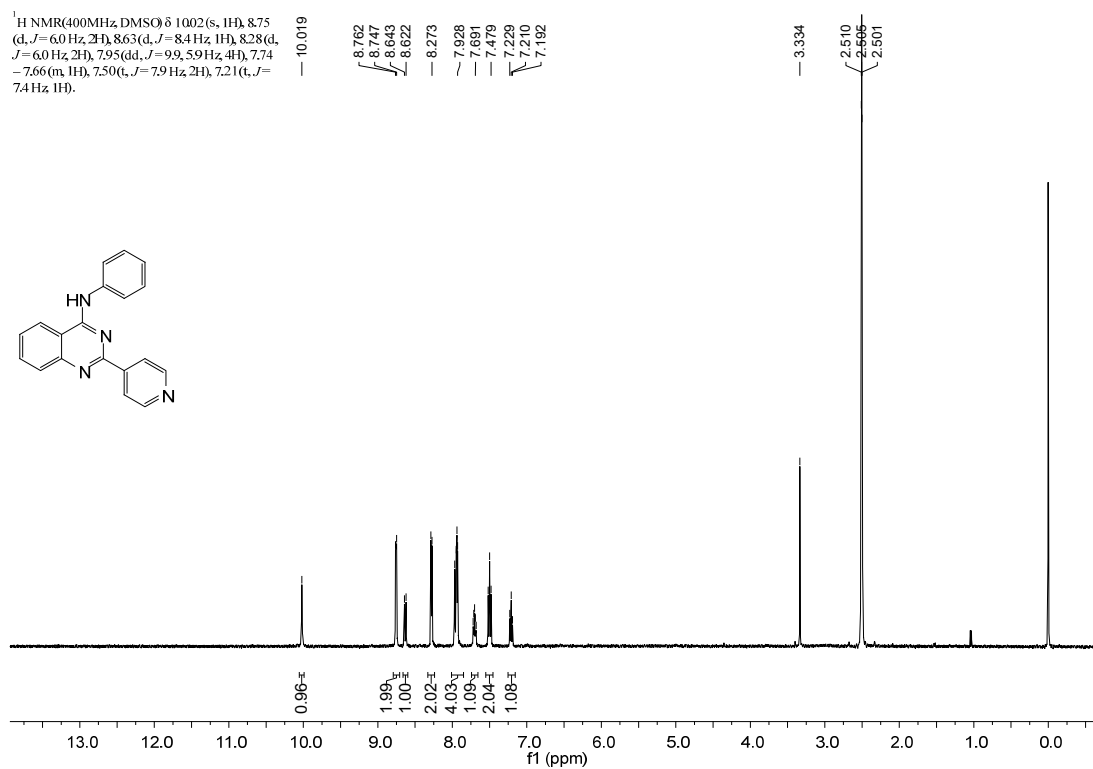

Figure S54. <sup>1</sup>H NMR (400 MHz, *d*<sub>6</sub>-DMSO) of **21**

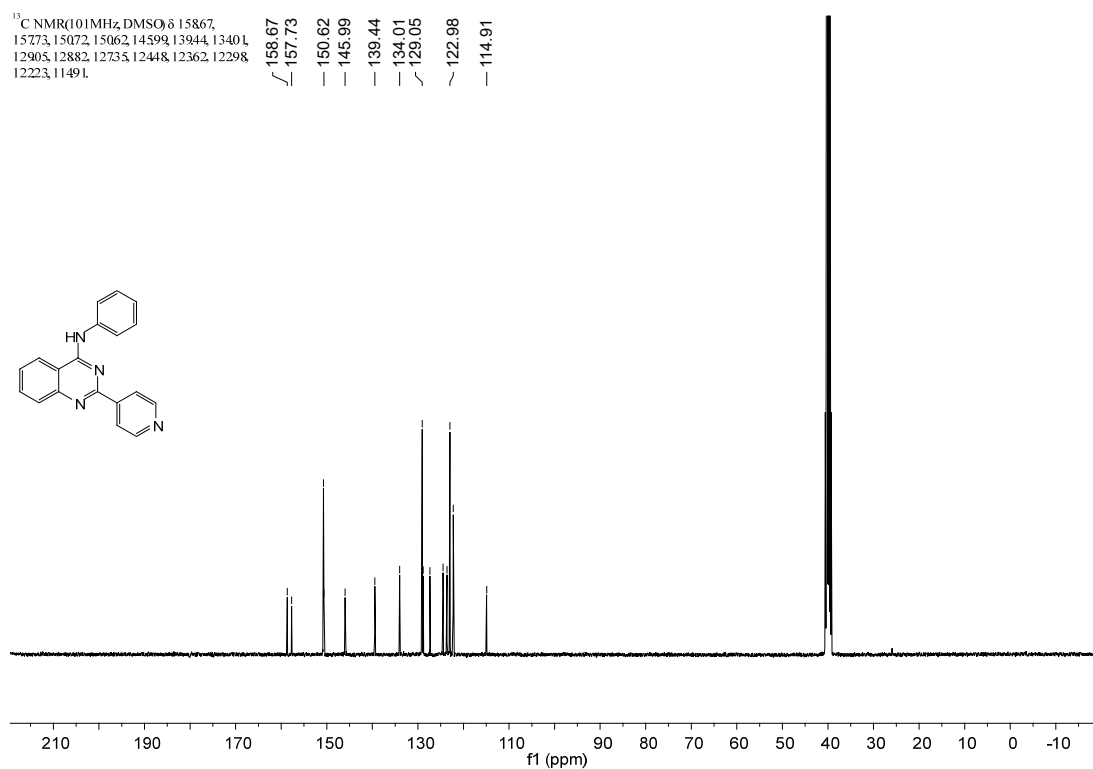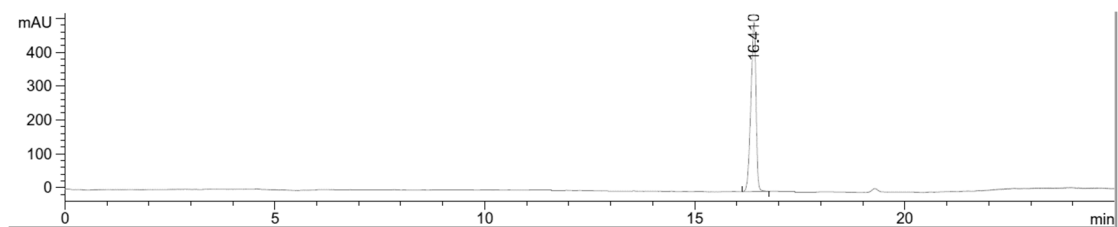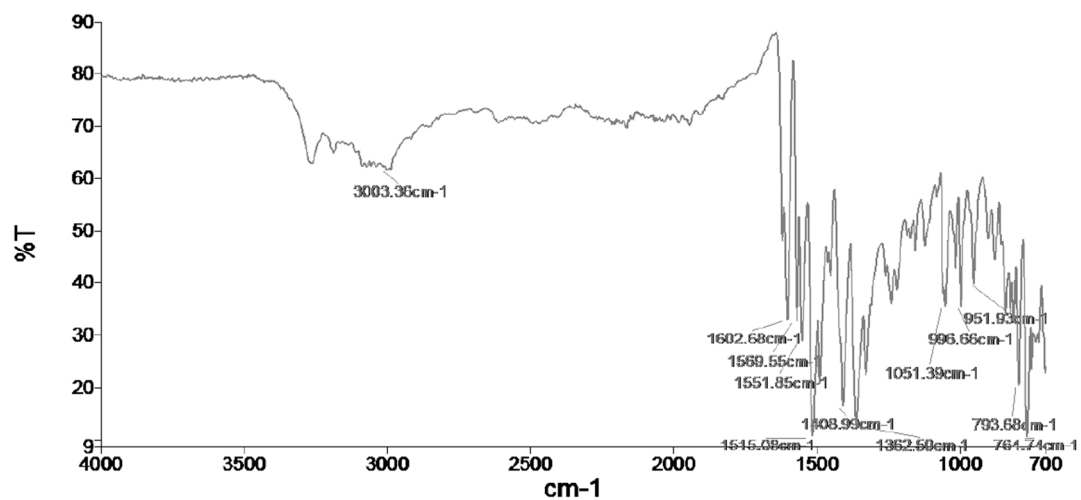

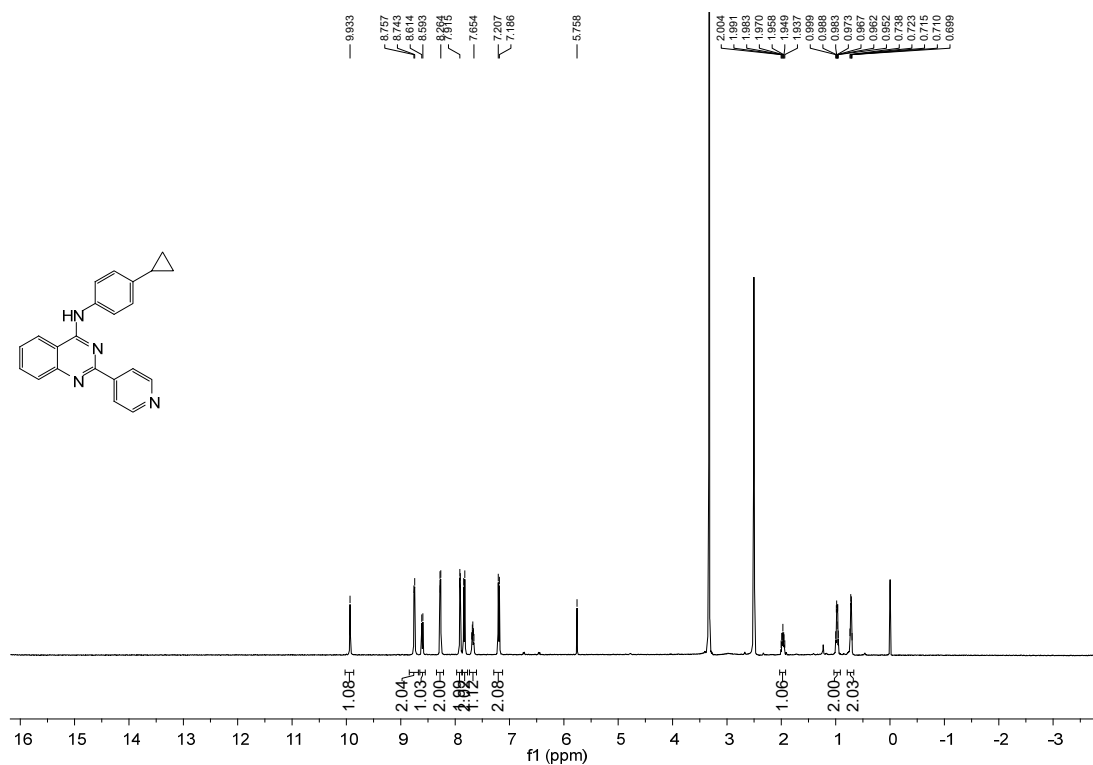

Figure S58. <sup>1</sup>H NMR (400 MHz, *d*<sub>6</sub>-DMSO) of **22**

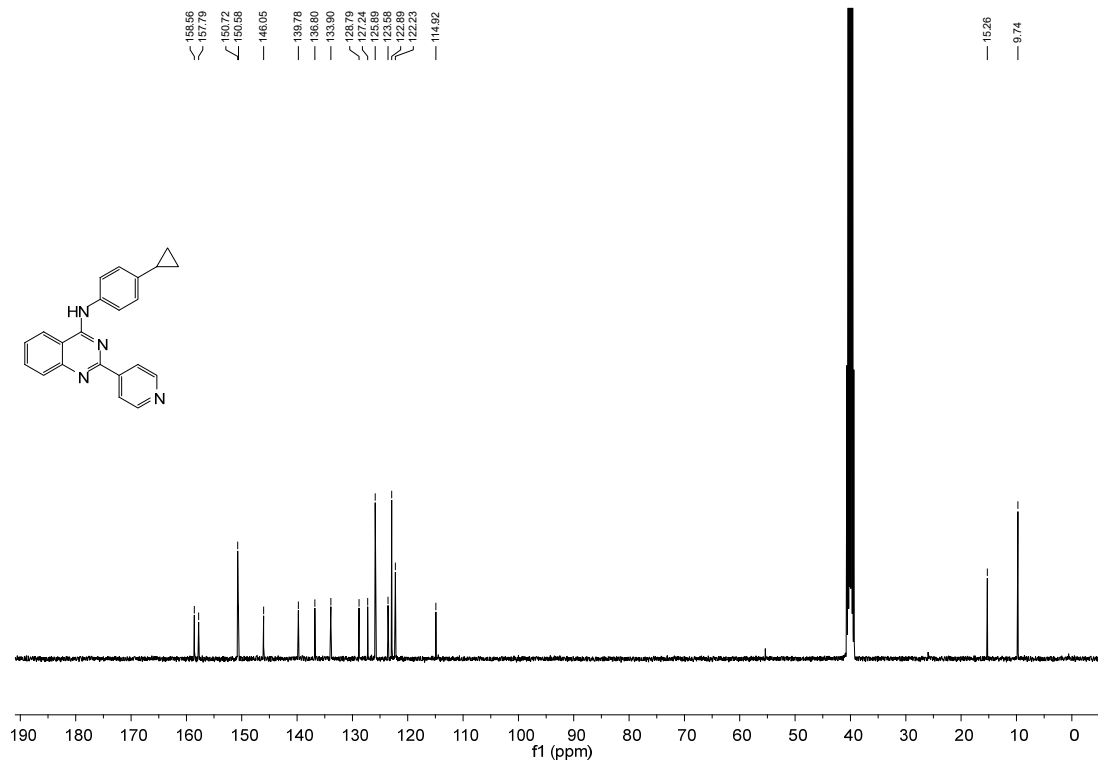

Figure S59. <sup>13</sup>C NMR (101 MHz, *d*<sub>6</sub>-DMSO) of **22**



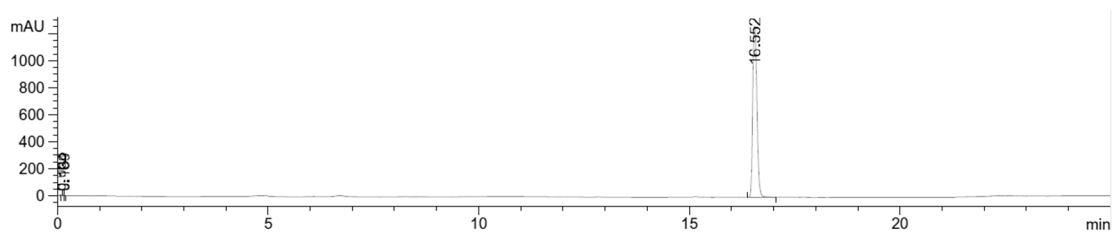

Figure S60. HPLC analysis of **23**

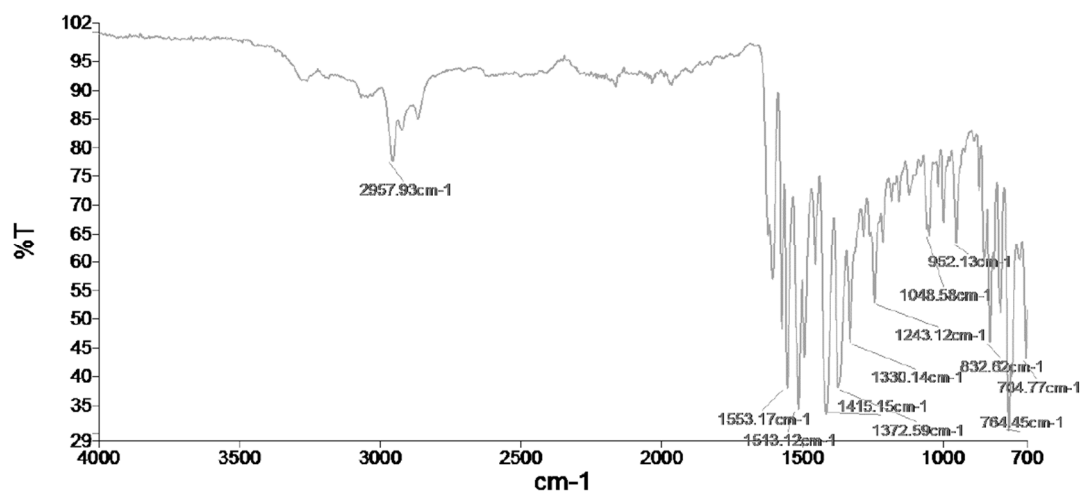

Figure S61. IR spectra of **23**

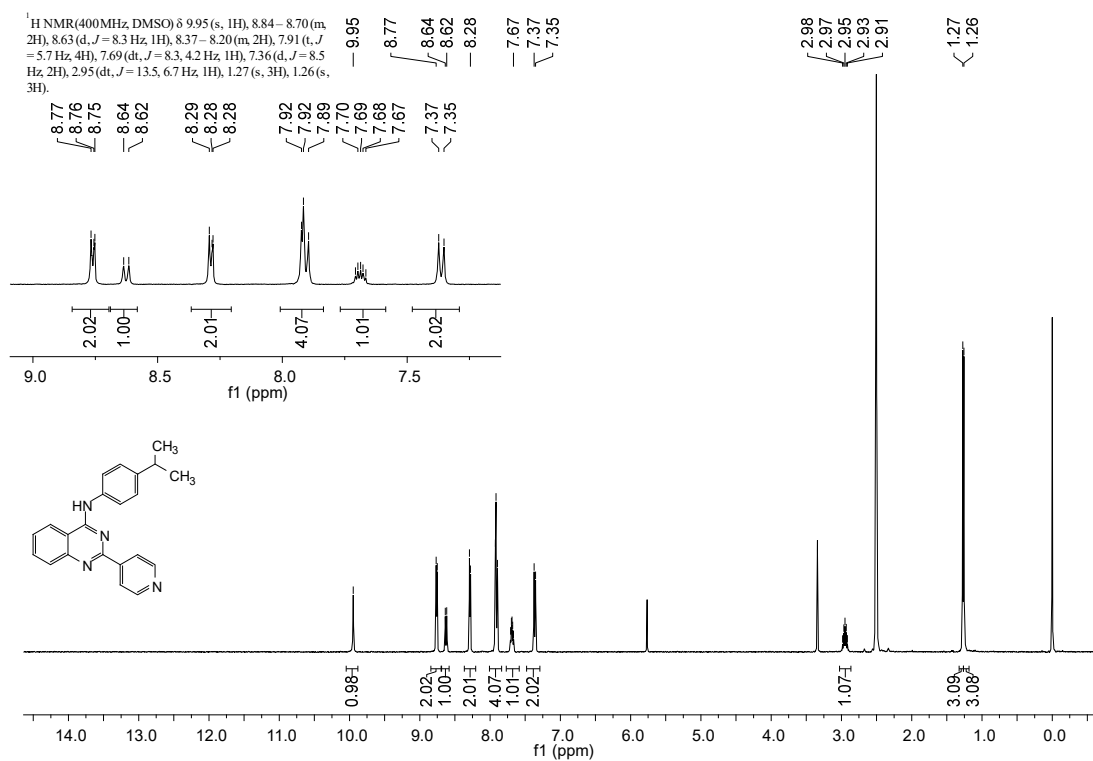

Figure S62. <sup>1</sup>H NMR (400 MHz, *d*<sub>6</sub>-DMSO) of **23**

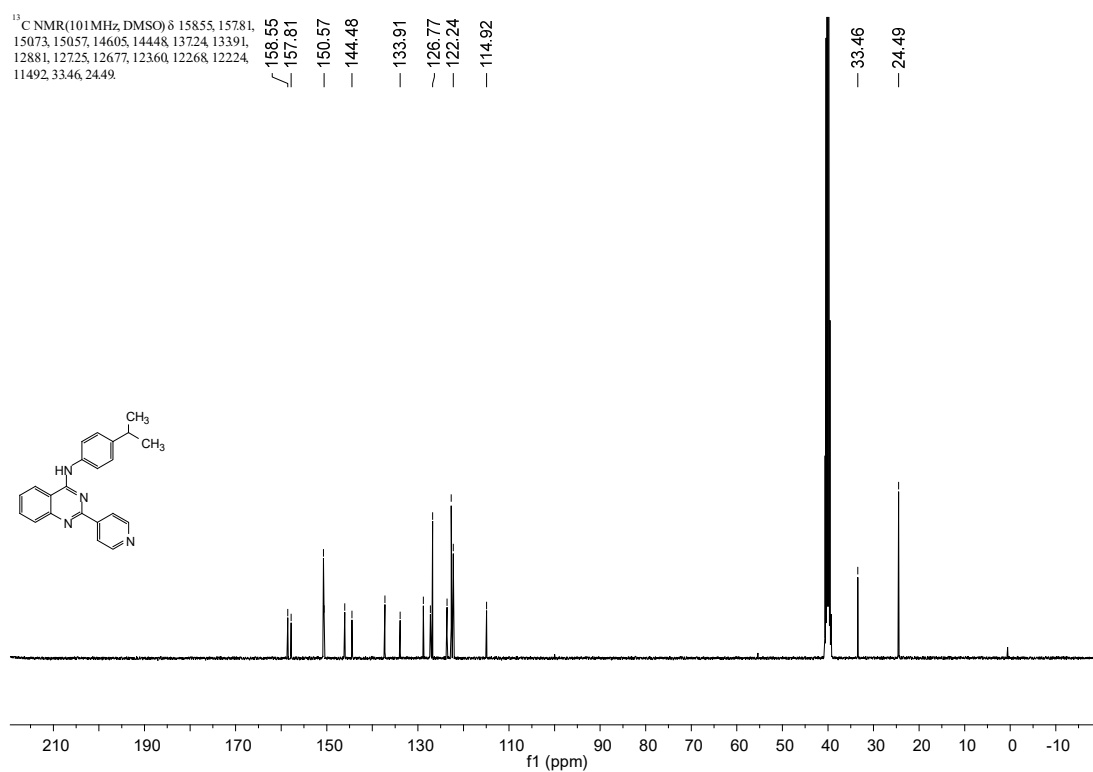

Figure S63. <sup>13</sup>C NMR (101 MHz, *d*<sub>6</sub>-DMSO) of **23**

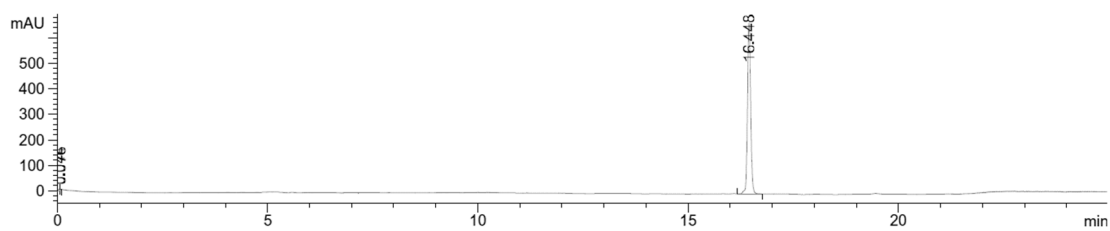

Figure S64. HPLC analysis of **24**

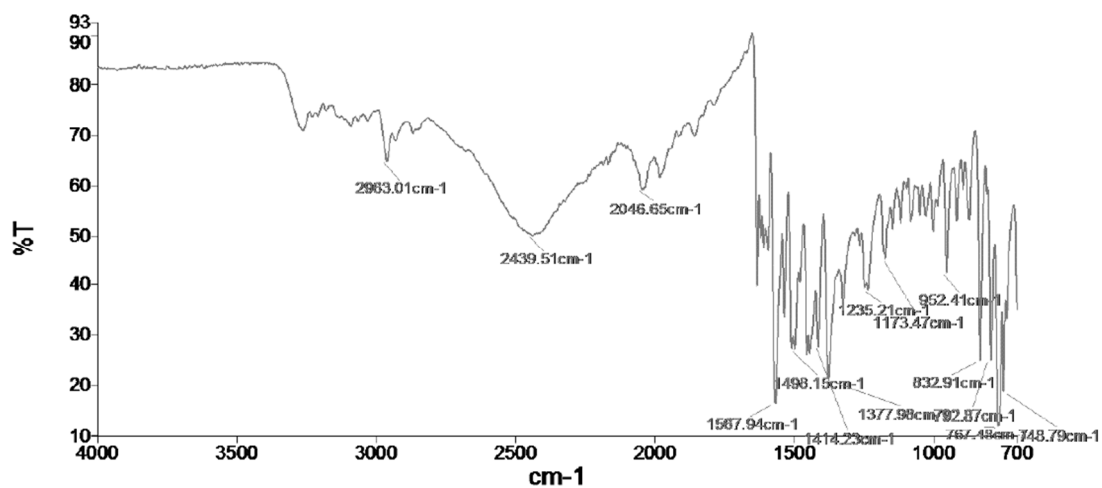

Figure S65. IR spectra of **24**

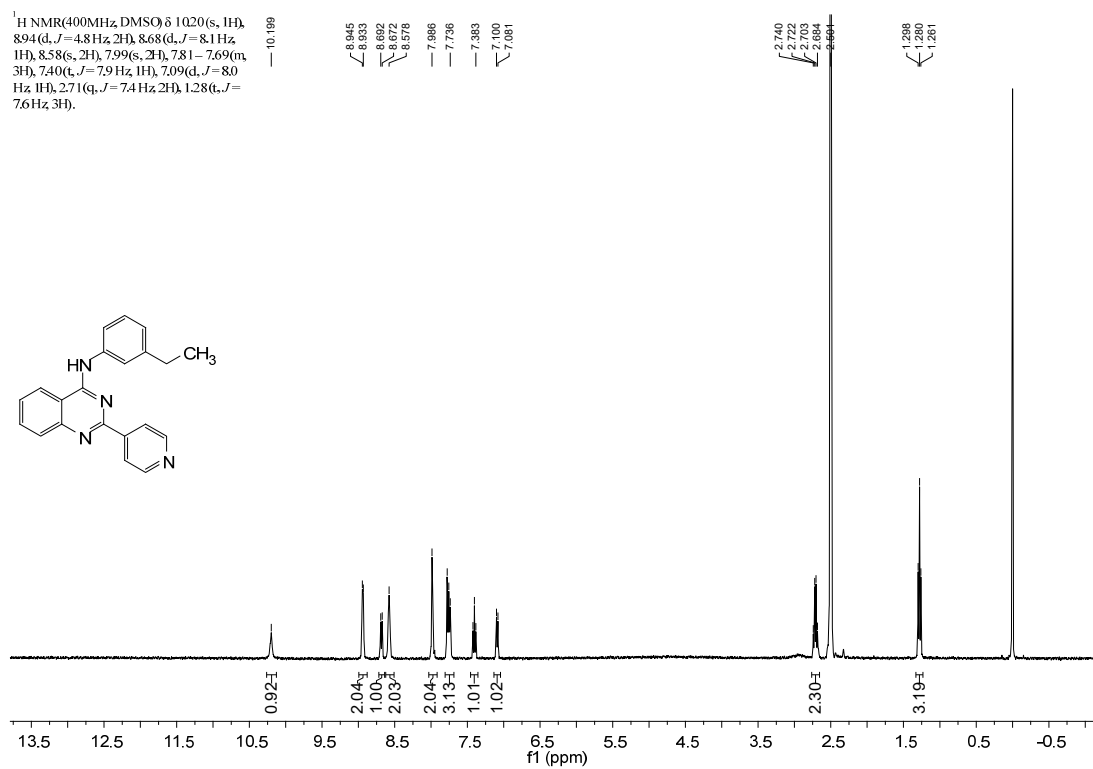

Figure S66. <sup>1</sup>H NMR (400 MHz, *d*<sub>6</sub>-DMSO) of **24**

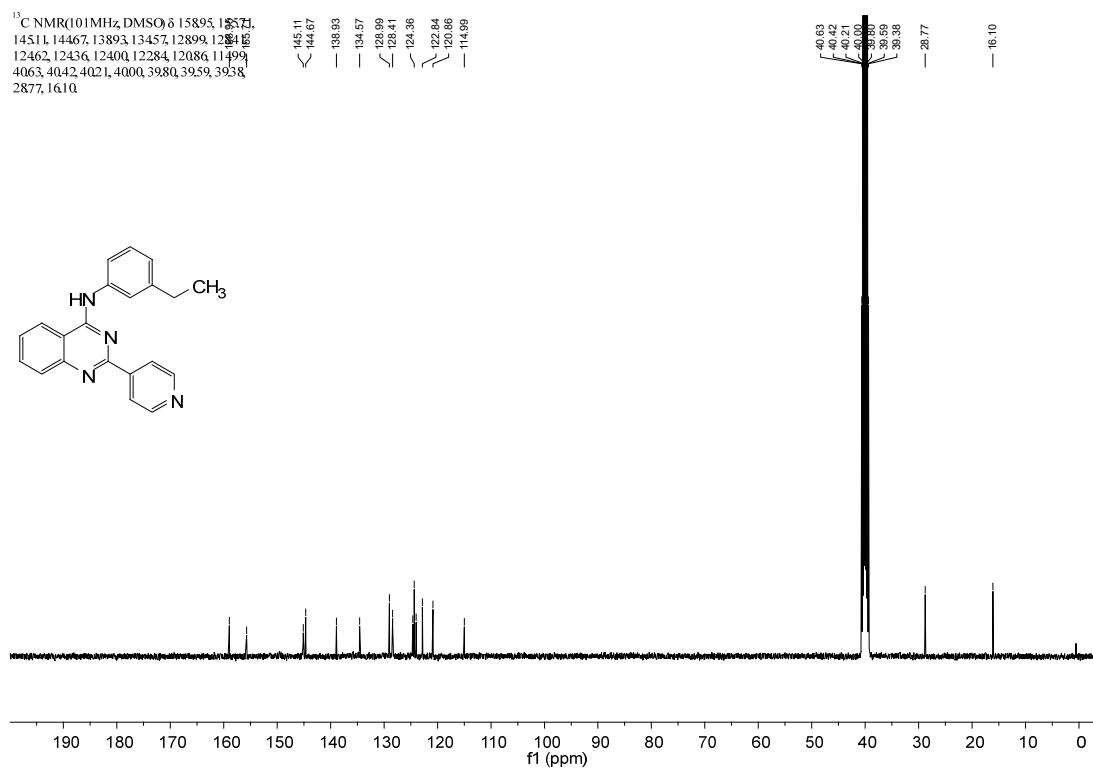

Figure S67. <sup>13</sup>C NMR (101 MHz, *d*<sub>6</sub>-DMSO) of **24**

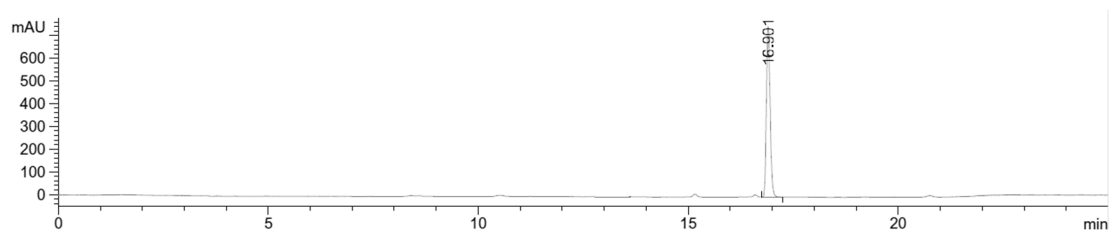

Figure S68. HPLC analysis of **25**

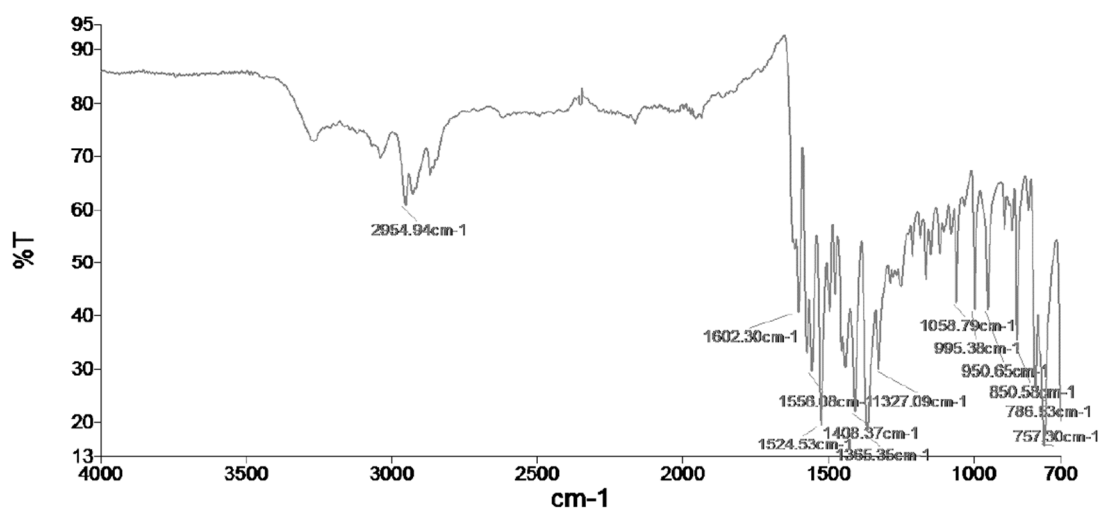

Figure S69. IR spectra of **25**

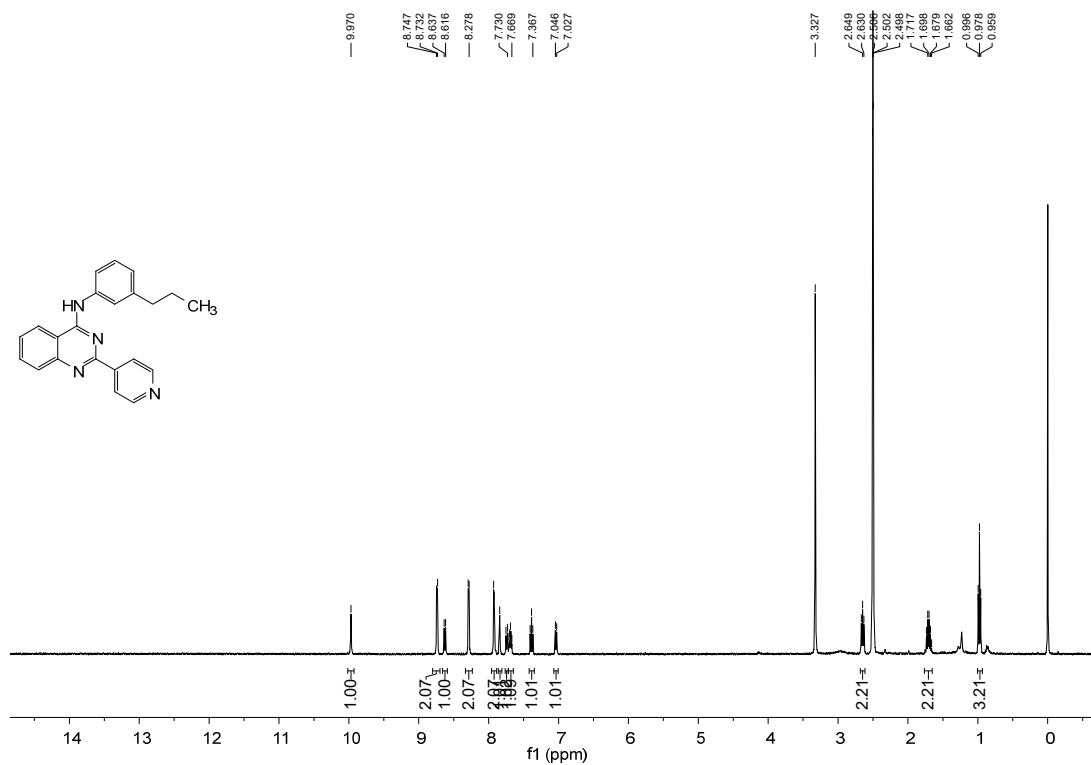

Figure S70. <sup>1</sup>H NMR (400 MHz, d<sub>6</sub>-DMSO) of **25**

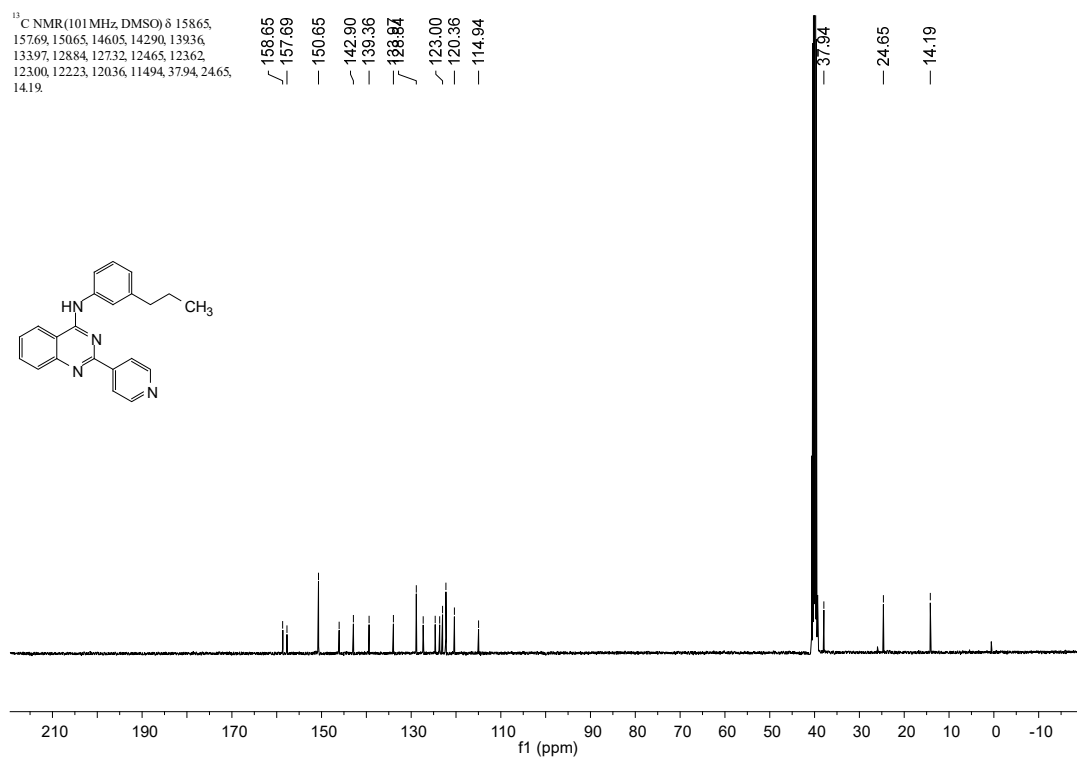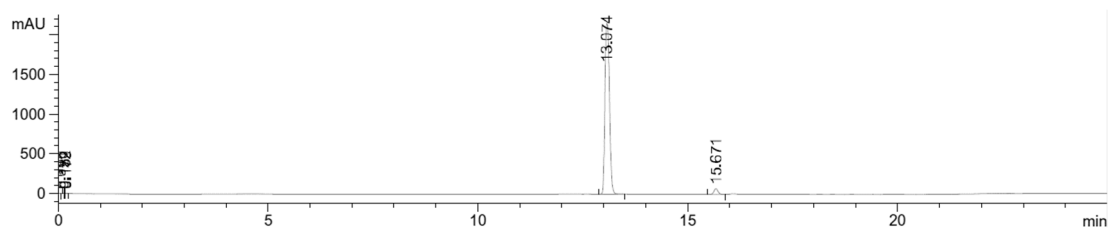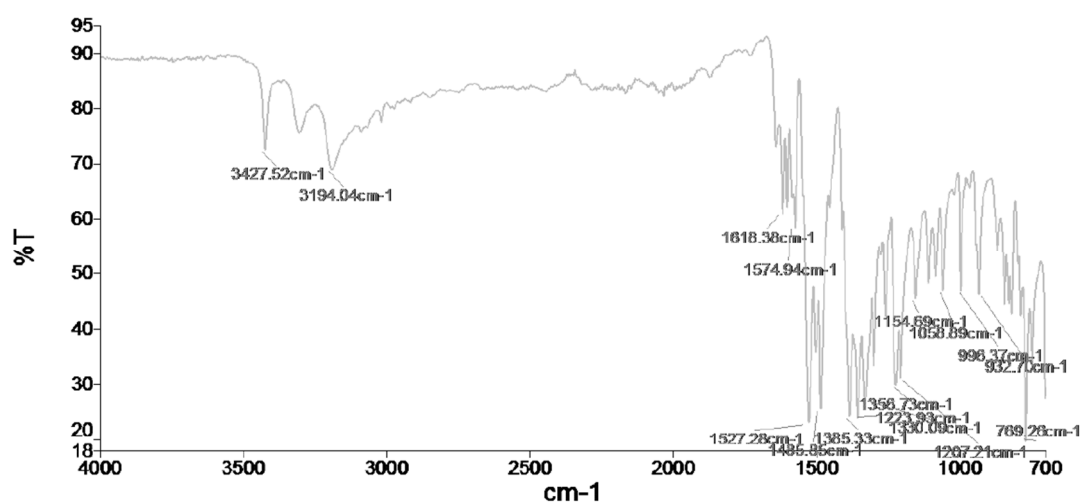

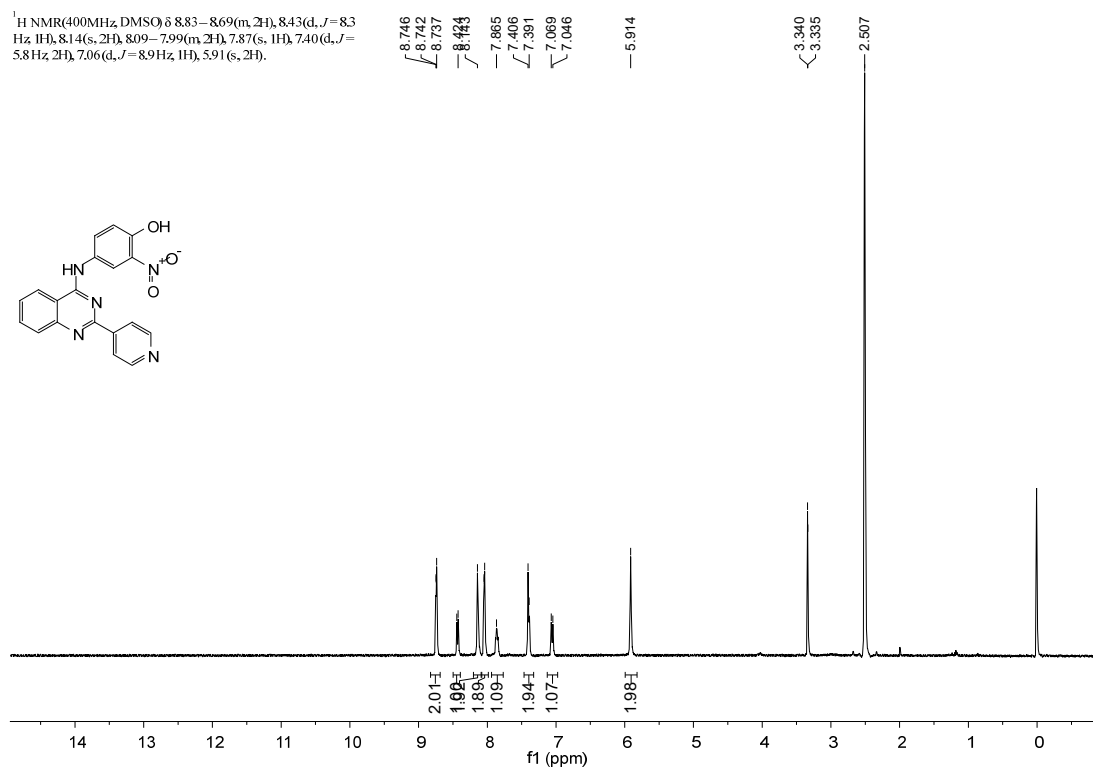

Figure S74. <sup>1</sup>H NMR (400 MHz, *d*<sub>6</sub>-DMSO) of **26**

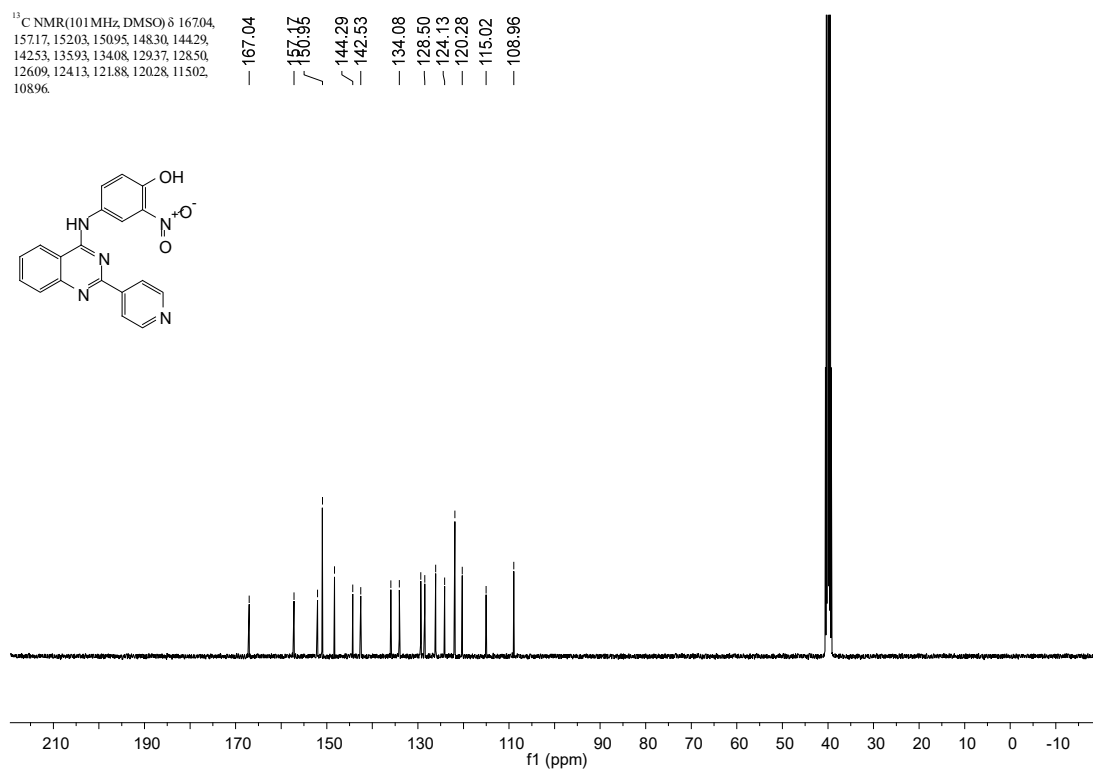

Figure S75. <sup>13</sup>C NMR (101 MHz, *d*<sub>6</sub>-DMSO) of **26**

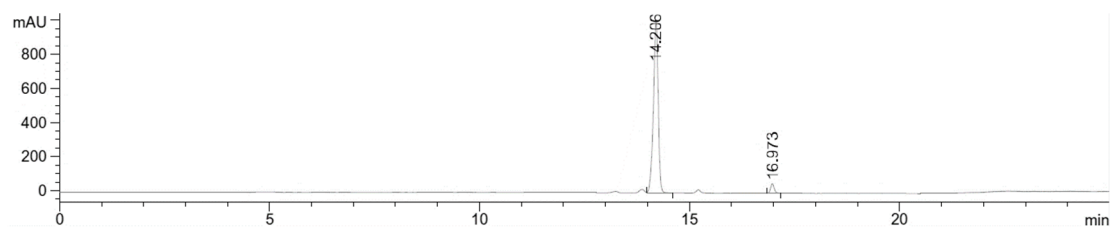

Figure S76. HPLC analysis of **27**

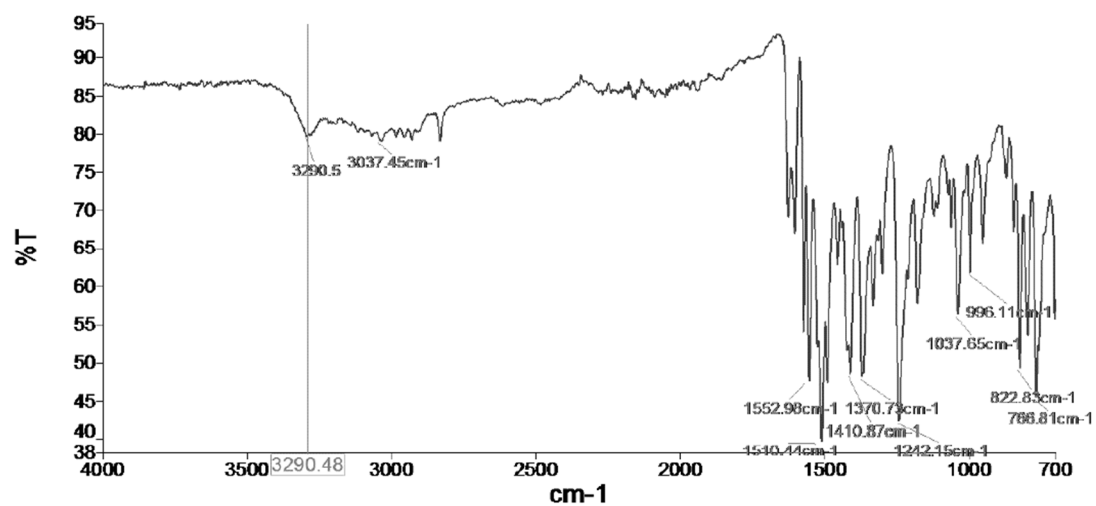

Figure S77. IR spectra of **27**

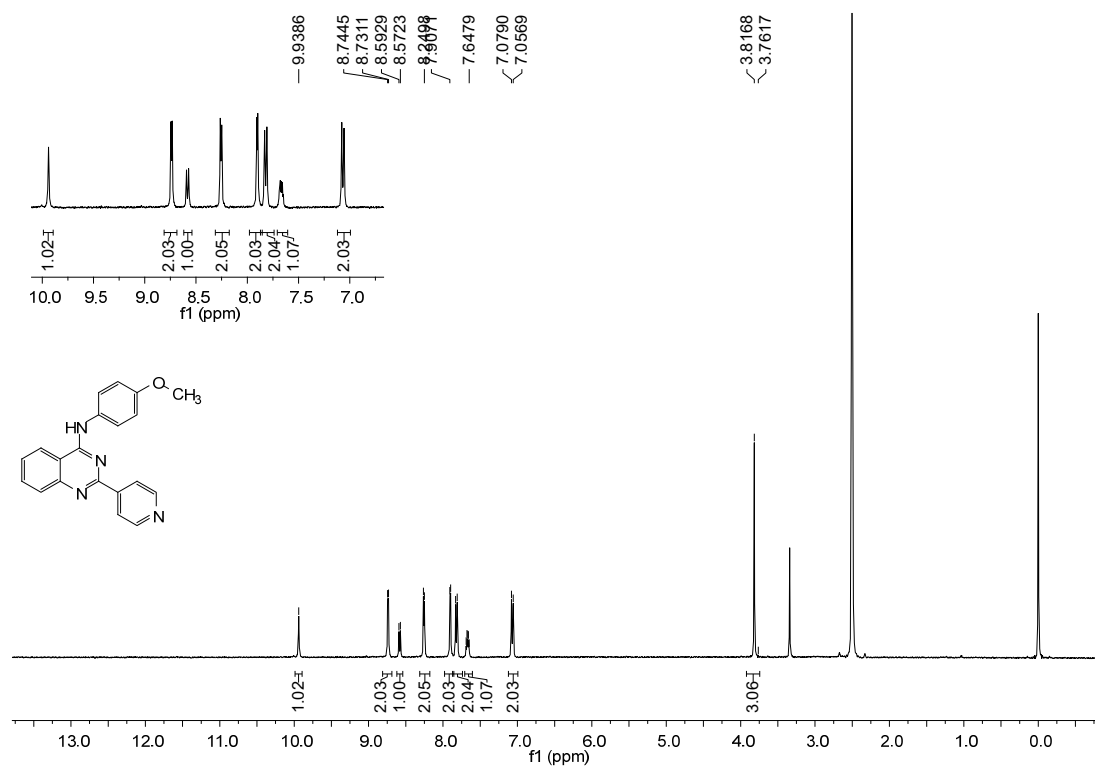

Figure S78. <sup>1</sup>H NMR (400 MHz, *d*<sub>6</sub>-DMSO) of **27**

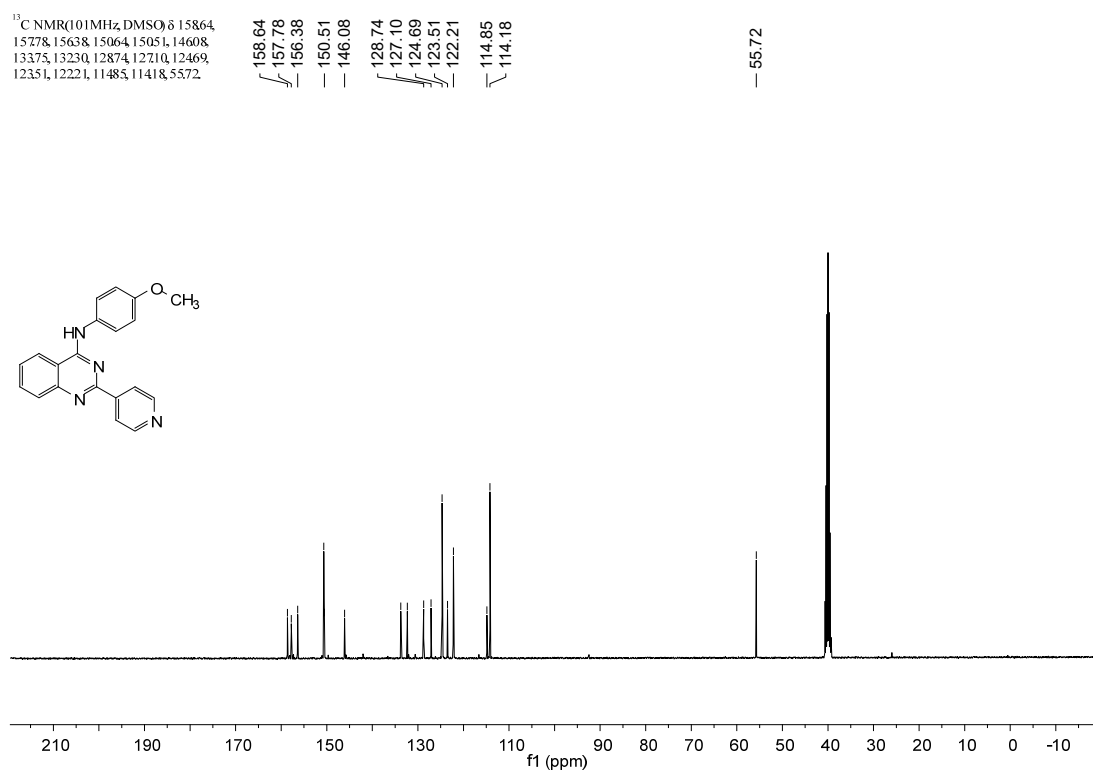

Figure S79. <sup>13</sup>C NMR (101 MHz, DMSO) of **27**

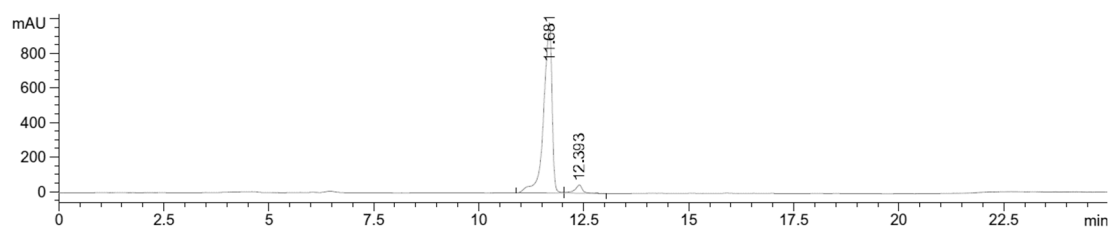

Figure S80. HPLC analysis of **28**

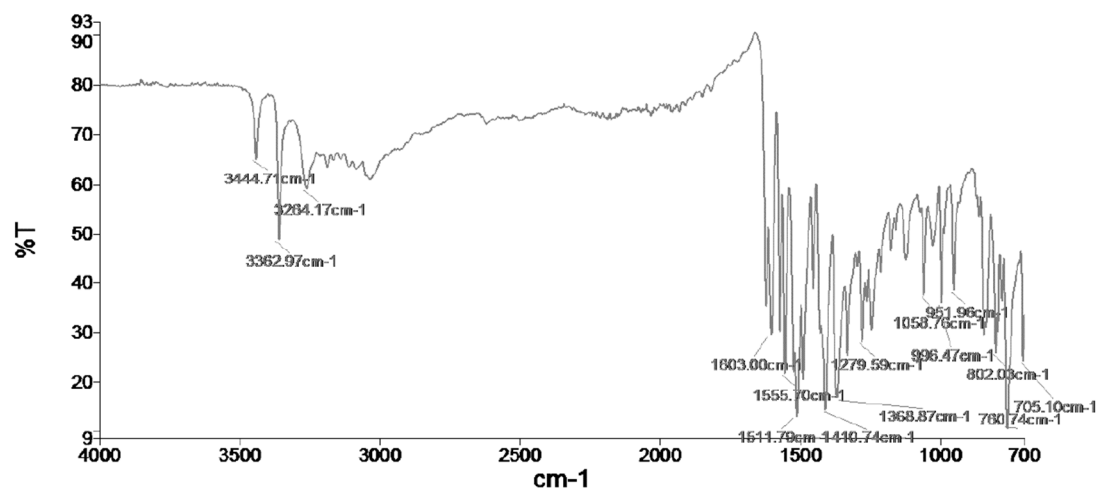

Figure S81. IR spectra of **28**



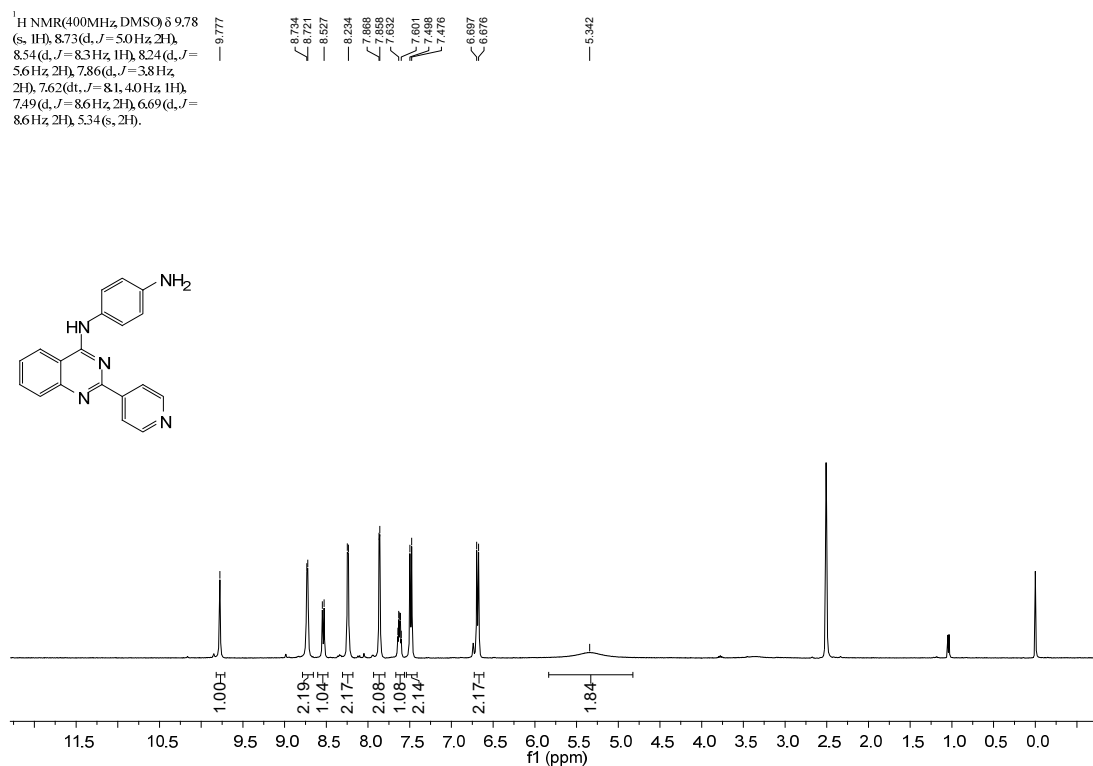

Figure S82. <sup>1</sup>H NMR (400 MHz, *d*<sub>6</sub>-DMSO) of **28**

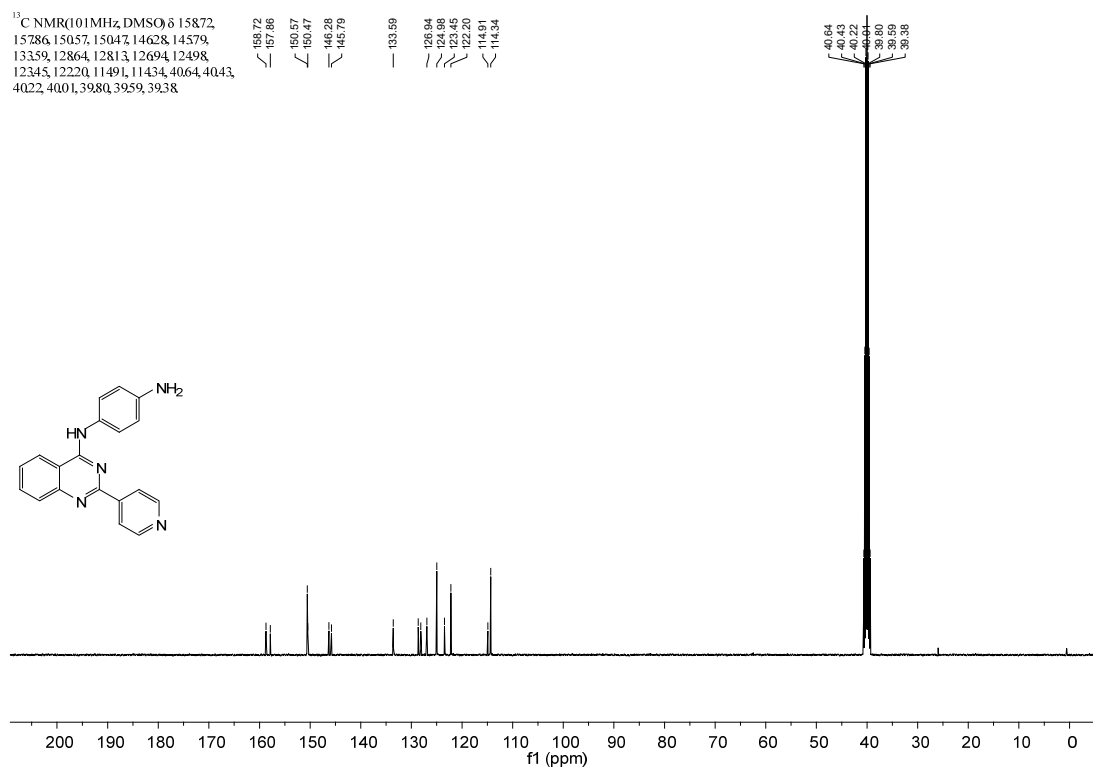

Figure S83. <sup>13</sup>C NMR (101 MHz, *d*<sub>6</sub>-DMSO) of **28**

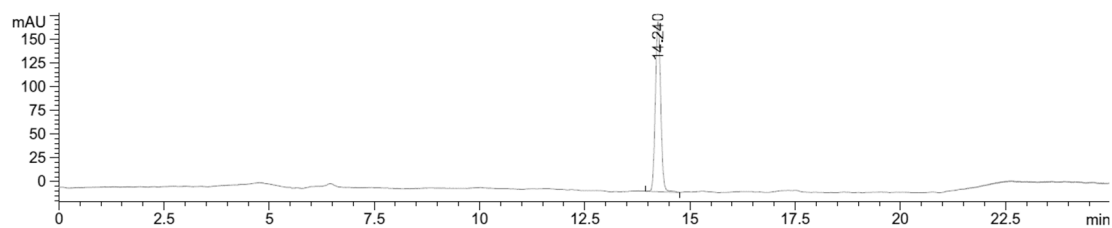

Figure S84. HPLC analysis of **29**

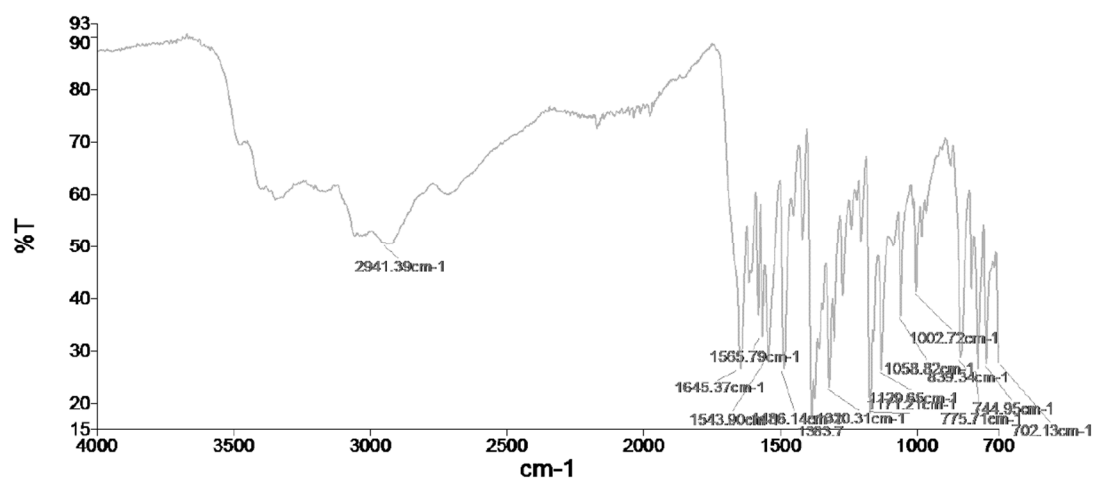

Figure S85. IR spectra of **29**

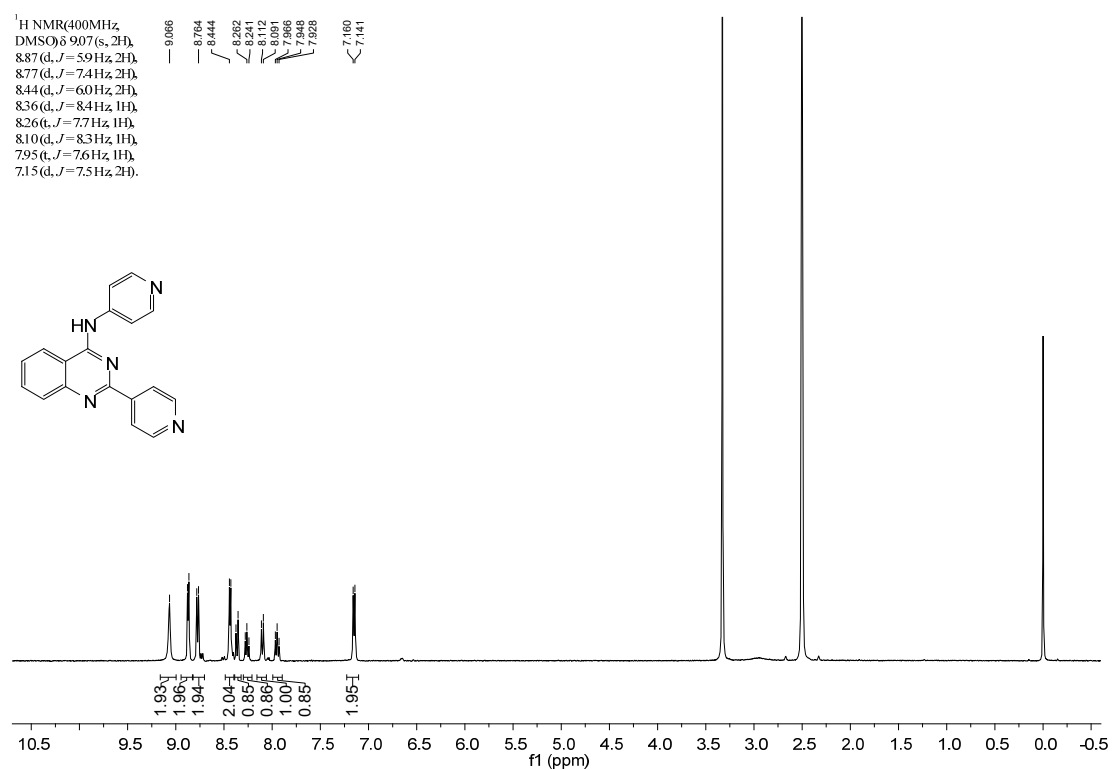

Figure S86. <sup>1</sup>H NMR (400 MHz, d<sub>6</sub>-DMSO) of **29**

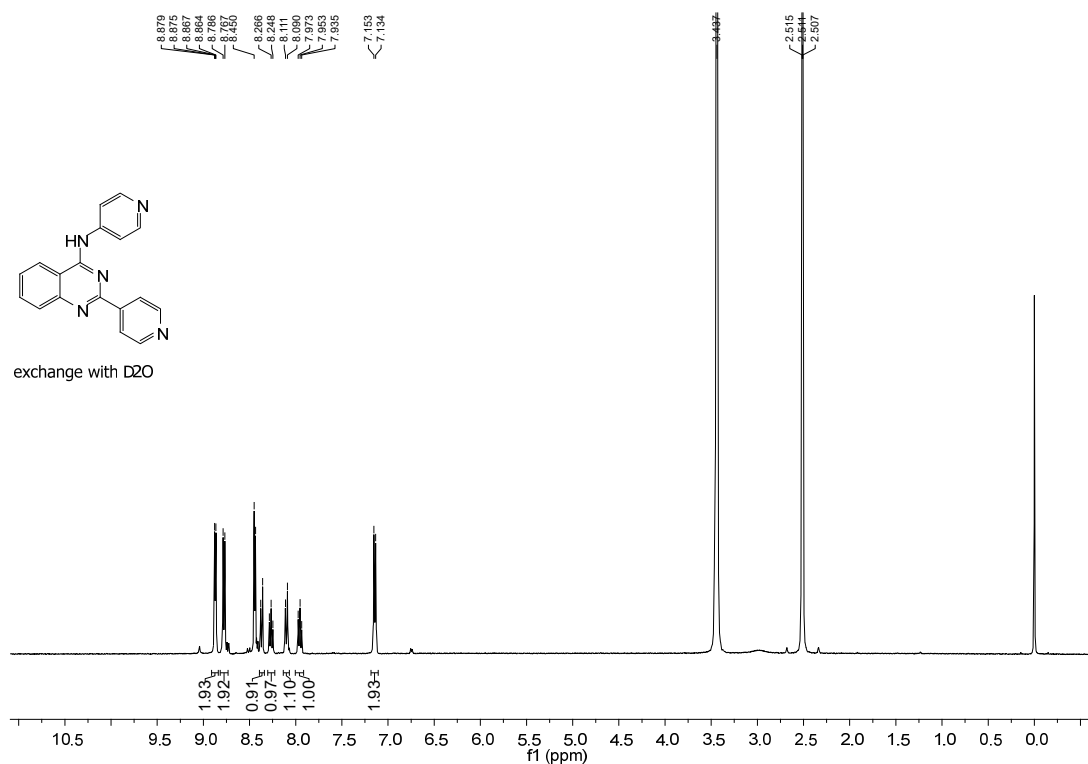

Figure S87. <sup>1</sup>H NMR (400 MHz, *d*<sub>6</sub>-DMSO) of **29**, exchange with D<sub>2</sub>O

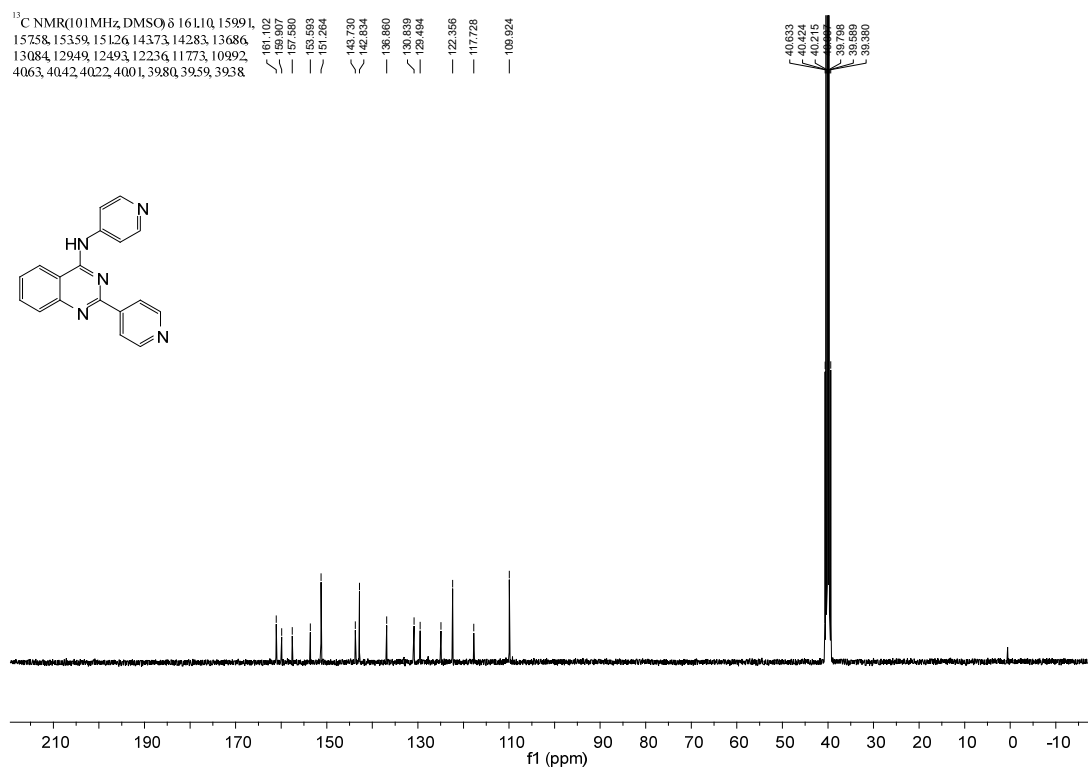

Figure S88. <sup>13</sup>C NMR (101 MHz, *d*<sub>6</sub>-DMSO) of **29**

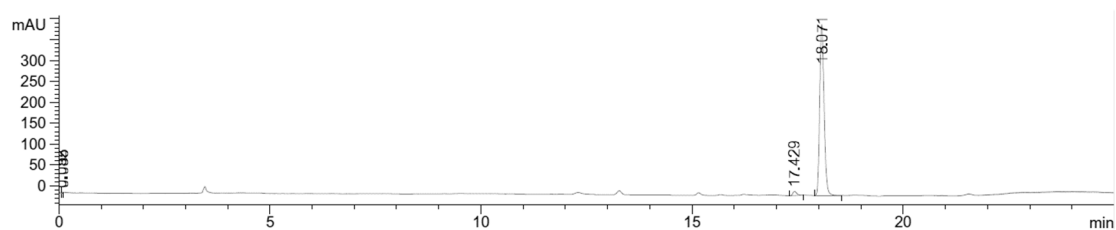

Figure S89. HPLC analysis of **30**

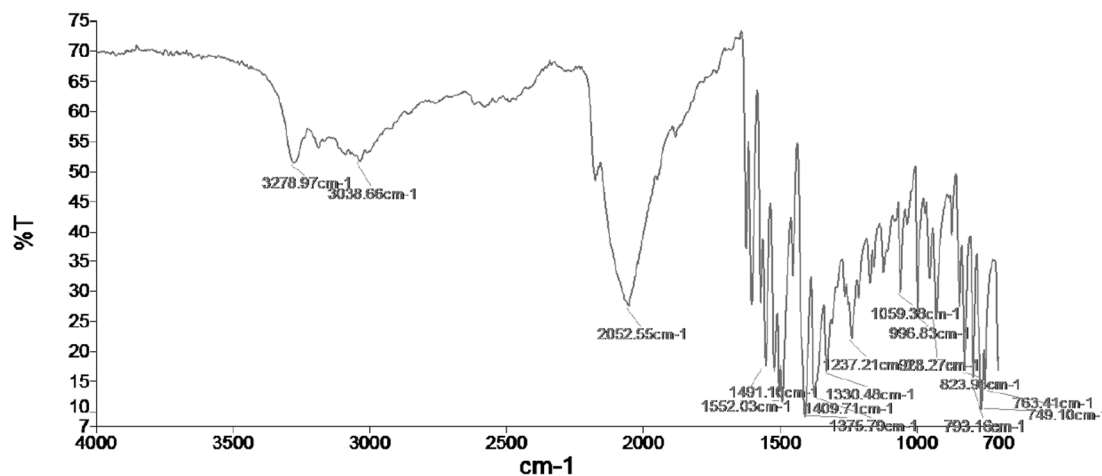

Figure S90. IR spectra of **30**

<sup>1</sup>H NMR (400 MHz, DMSO)  $\delta$  10.15 (s, 1H), 8.77 (d,  $J$  = 5.0 Hz, 2H), 8.61 (d,  $J$  = 8.4 Hz, 1H), 8.29 (d,  $J$  = 4.9 Hz, 2H), 8.15–8.02 (m, 2H), 7.95 (d,  $J$  = 3.4 Hz, 2H), 7.79–7.67 (m, 1H), 7.57 (d,  $J$  = 8.6 Hz, 2H).

8.773  
8.760  
8.623  
8.602  
8.283  
7.860  
7.733  
7.722  
7.715  
7.680  
7.568

3.312  
2.507

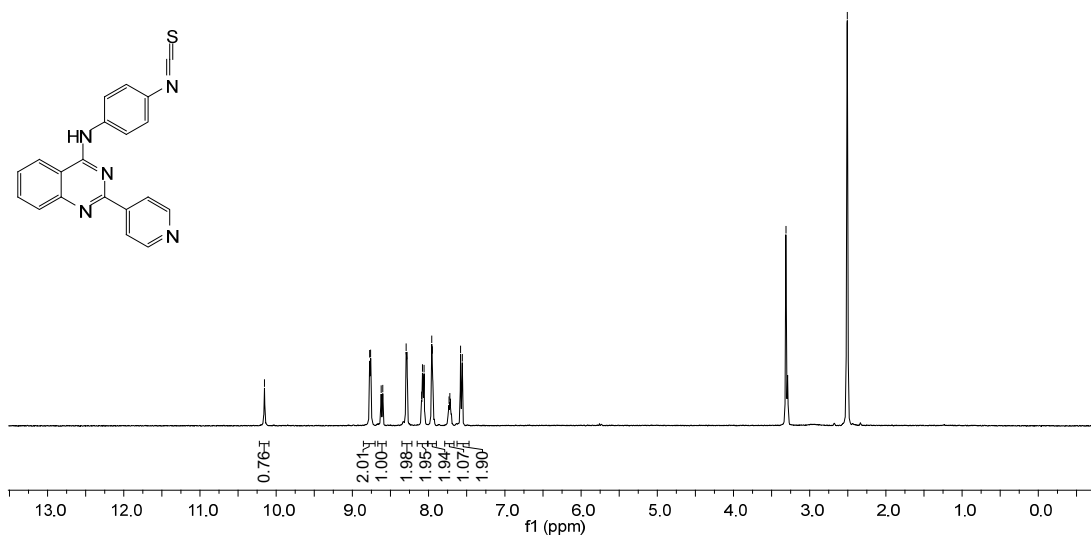

Figure S91. <sup>1</sup>H NMR (400 MHz, *d*<sub>6</sub>-DMSO) of **30**

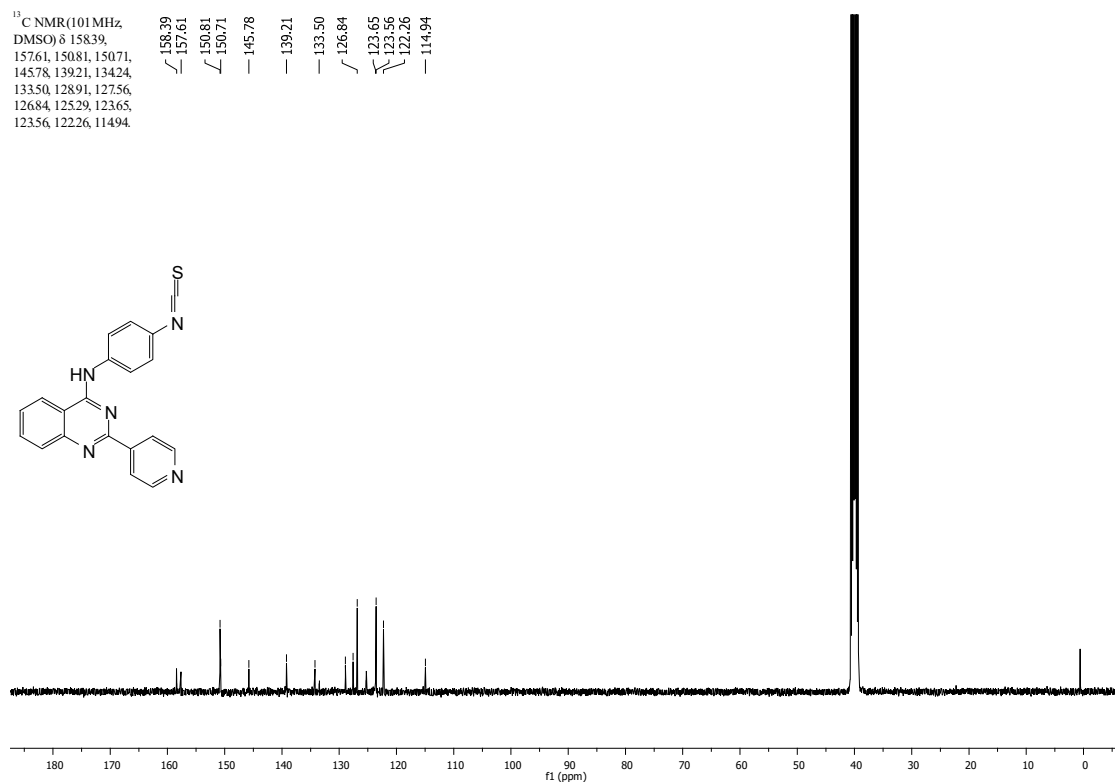

Figure S92. <sup>13</sup>C NMR (101 MHz, *d*<sub>6</sub>-DMSO) of **30**

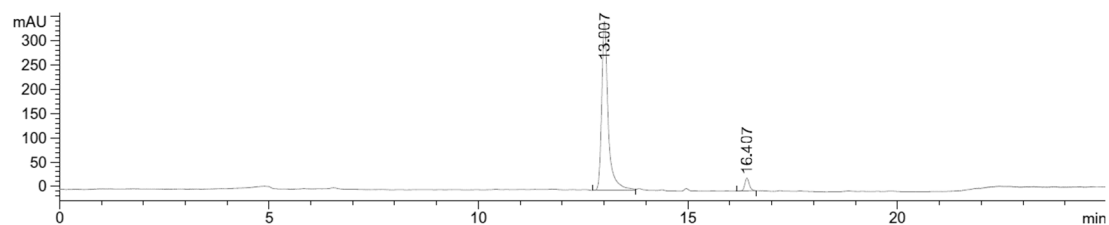

Figure S93. HPLC analysis of **31**

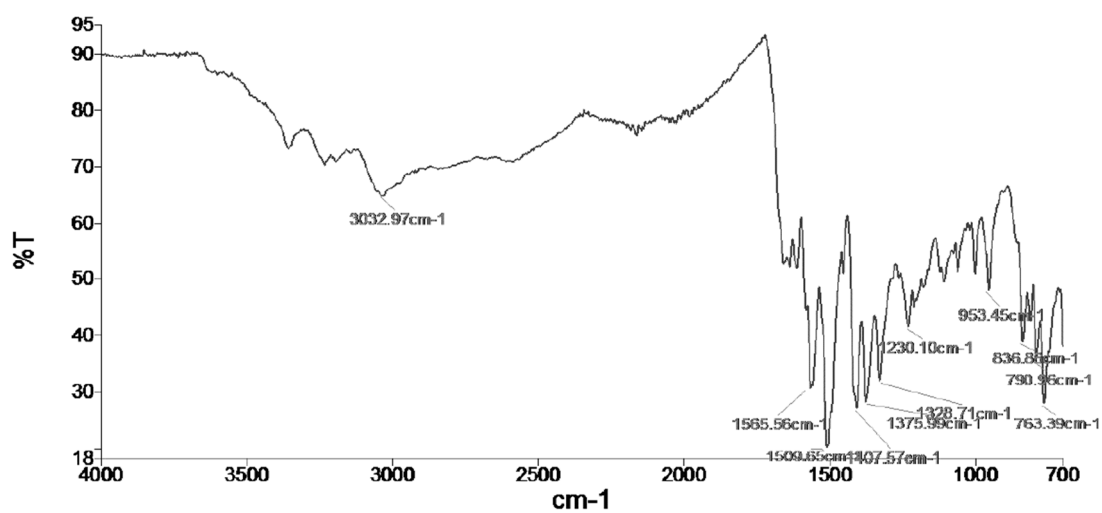

Figure S94. IR spectra of **31**

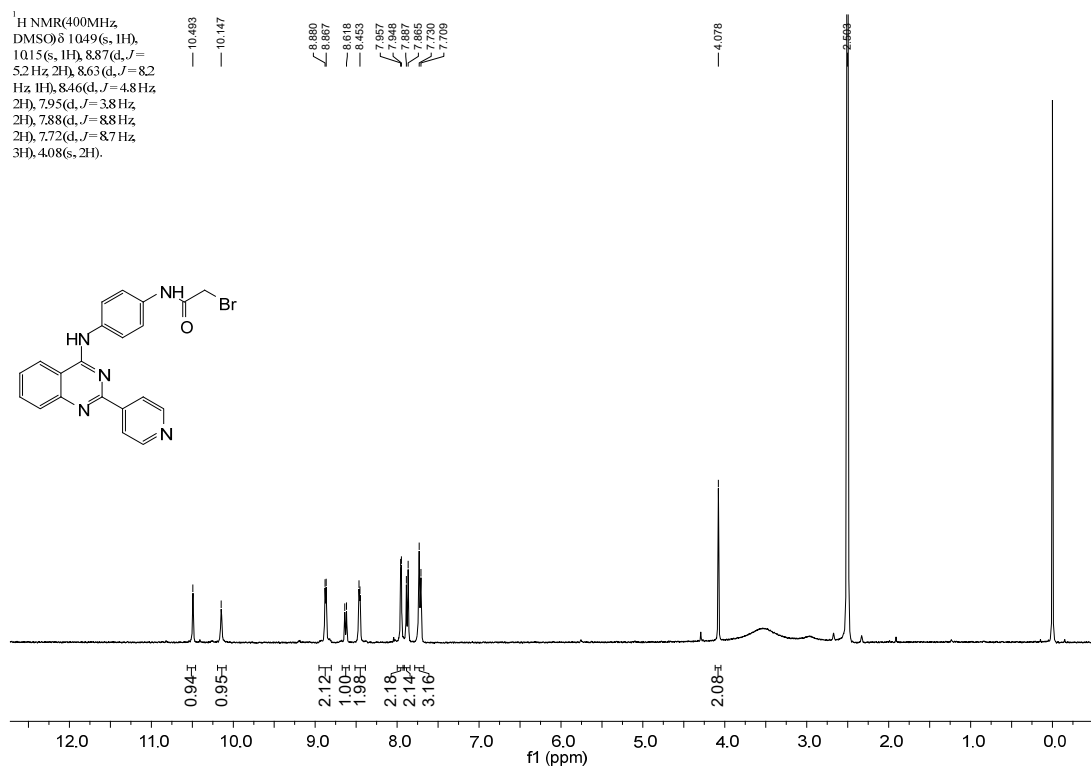

Figure S95. <sup>1</sup>H NMR (400 MHz, *d*<sub>6</sub>-DMSO) of **31**

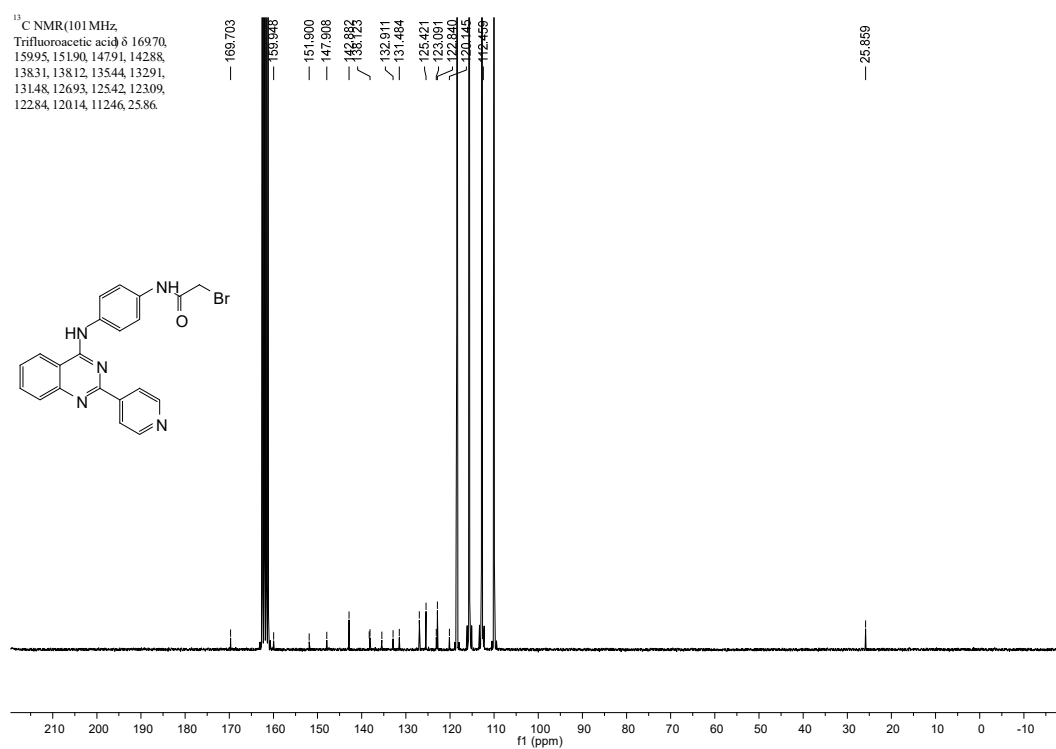

Figure S96. <sup>13</sup>C NMR (101 MHz, *d*<sub>1</sub>-CF<sub>3</sub>COOD) of **31**

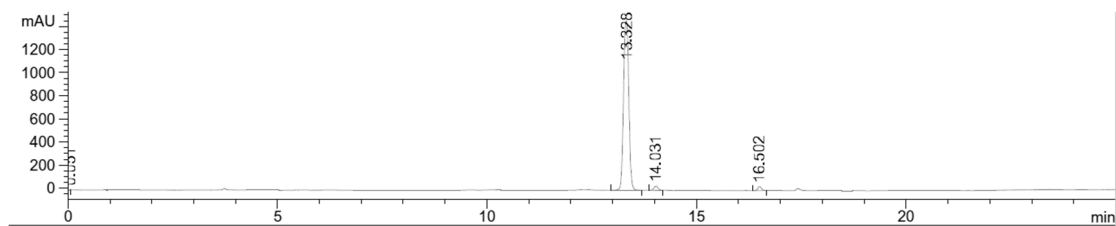

Figure S97. HPLC analysis of **32**

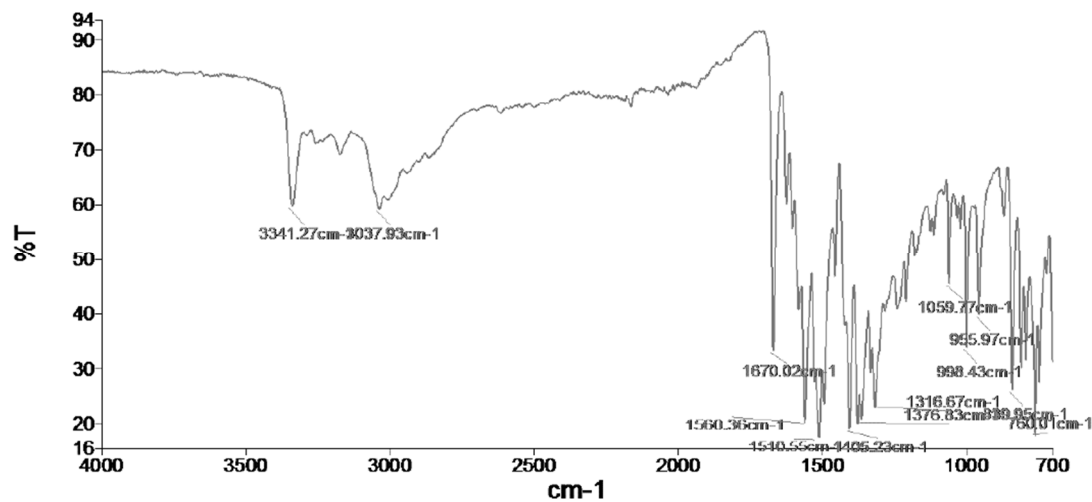

Figure S98. IR spectra of **32**

<sup>1</sup>H NMR(400MHz, DMSO-*d*<sub>6</sub>) δ  
 9.98(d, *J*=8.7 Hz, 2H), 8.75(d, *J*=5.1 Hz, 2H), 8.60(d, *J*=8.2 Hz, 1H), 8.27(d, *J*=4.9 Hz, 2H), 7.91(d, *J*=3.8 Hz, 2H), 7.84(d, *J*=8.6 Hz, 2H), 7.69(d, *J*=8.8 Hz, 3H), 2.05(d, *J*=27.1 Hz, 3H).

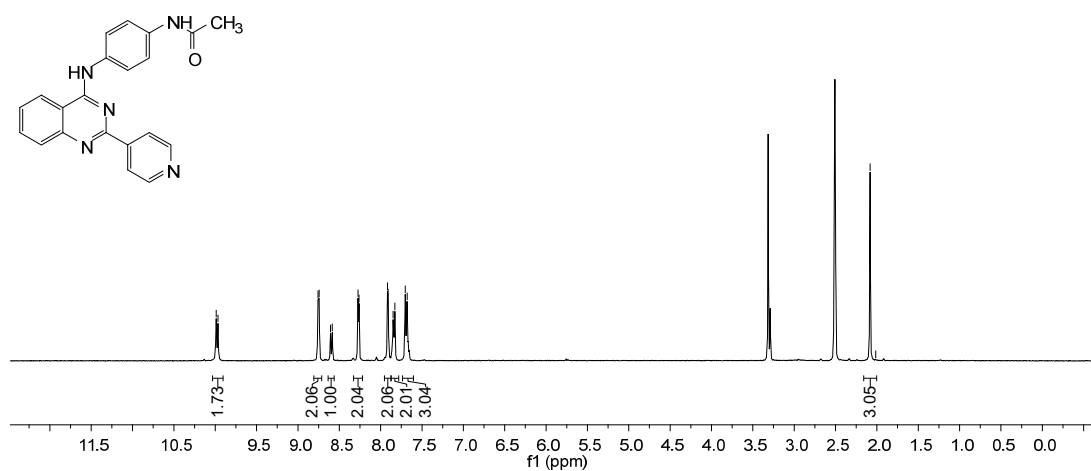

Figure S99. <sup>1</sup>H NMR (400 MHz, *d*<sub>6</sub>-DMSO) of **32**

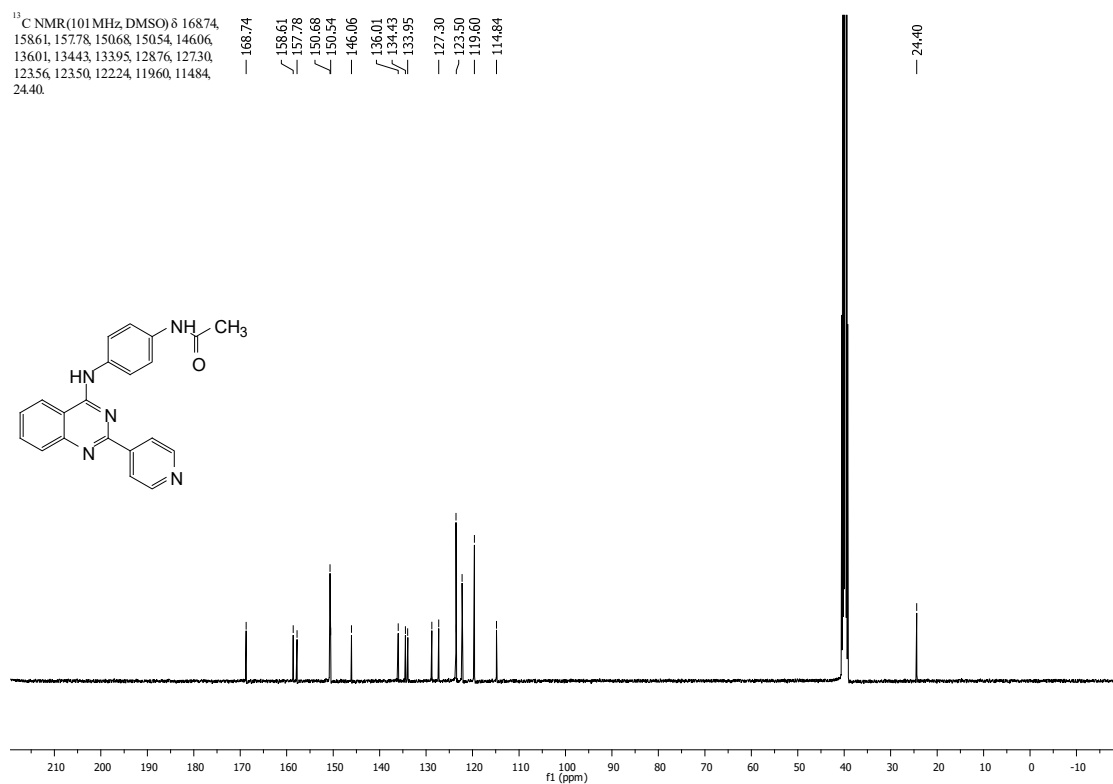

Figure S100. <sup>13</sup>C NMR (101 MHz, *d*<sub>6</sub>-DMSO) of **32**

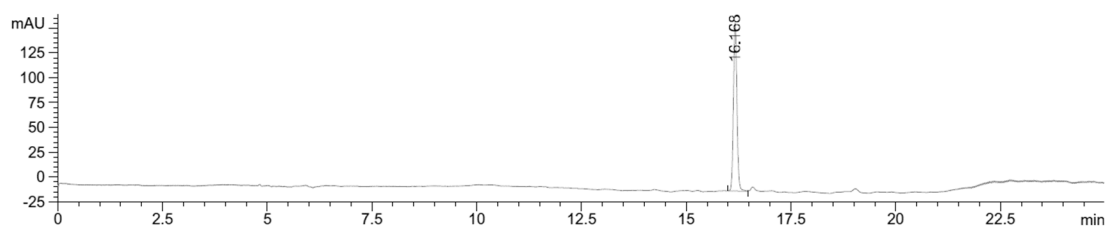

Figure S101. HPLC analysis of **33**

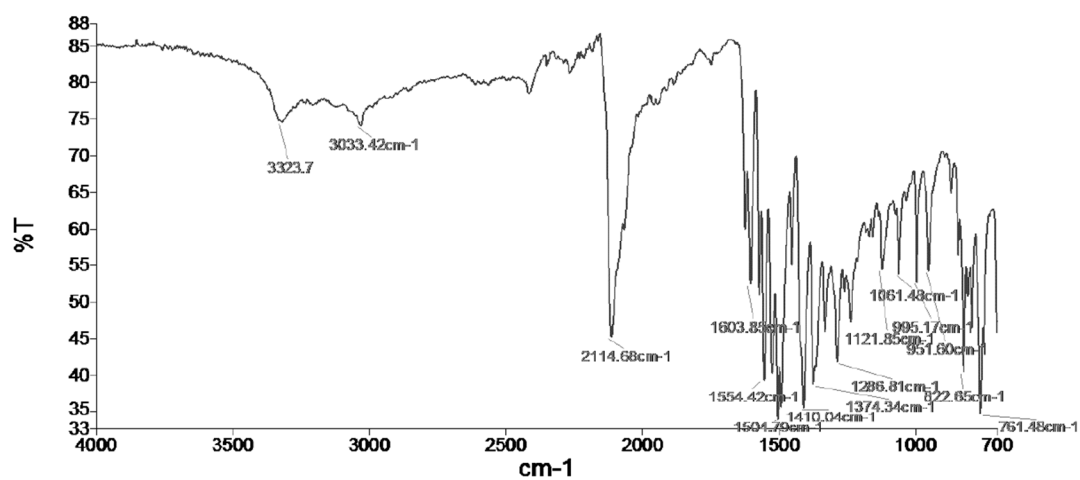

Figure S102. IR spectra of **33**



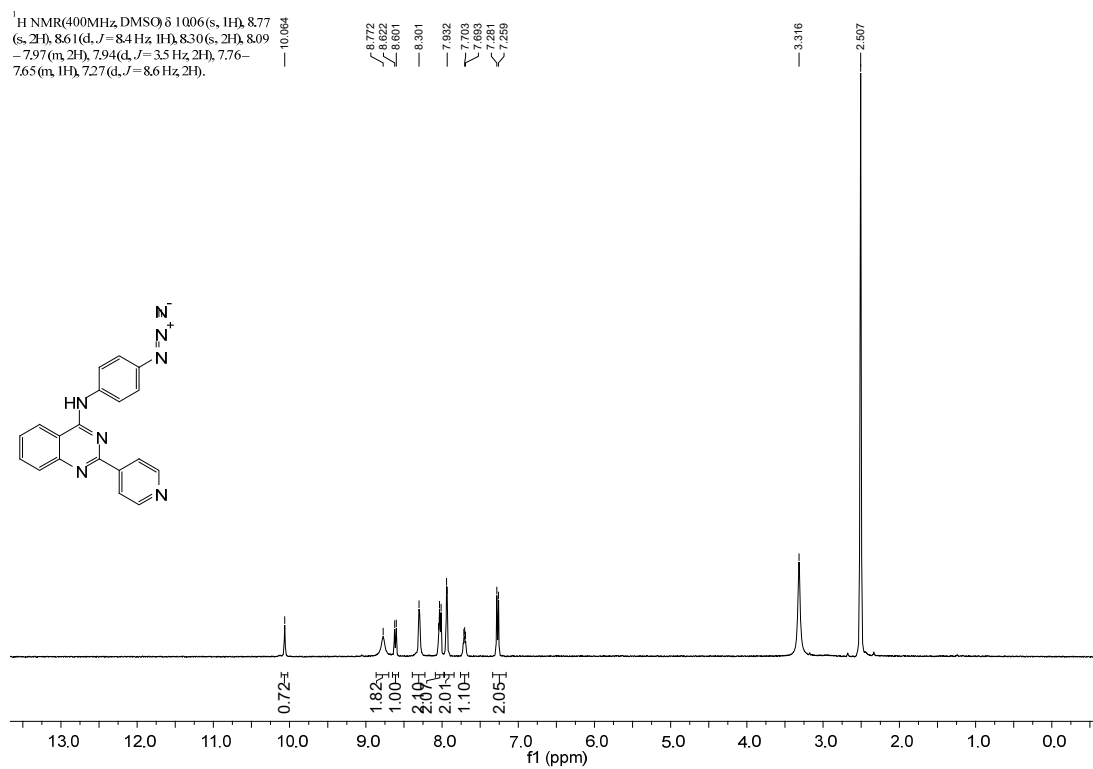

Figure S103. <sup>1</sup>H NMR (400 MHz, *d*<sub>6</sub>-DMSO) of **33**

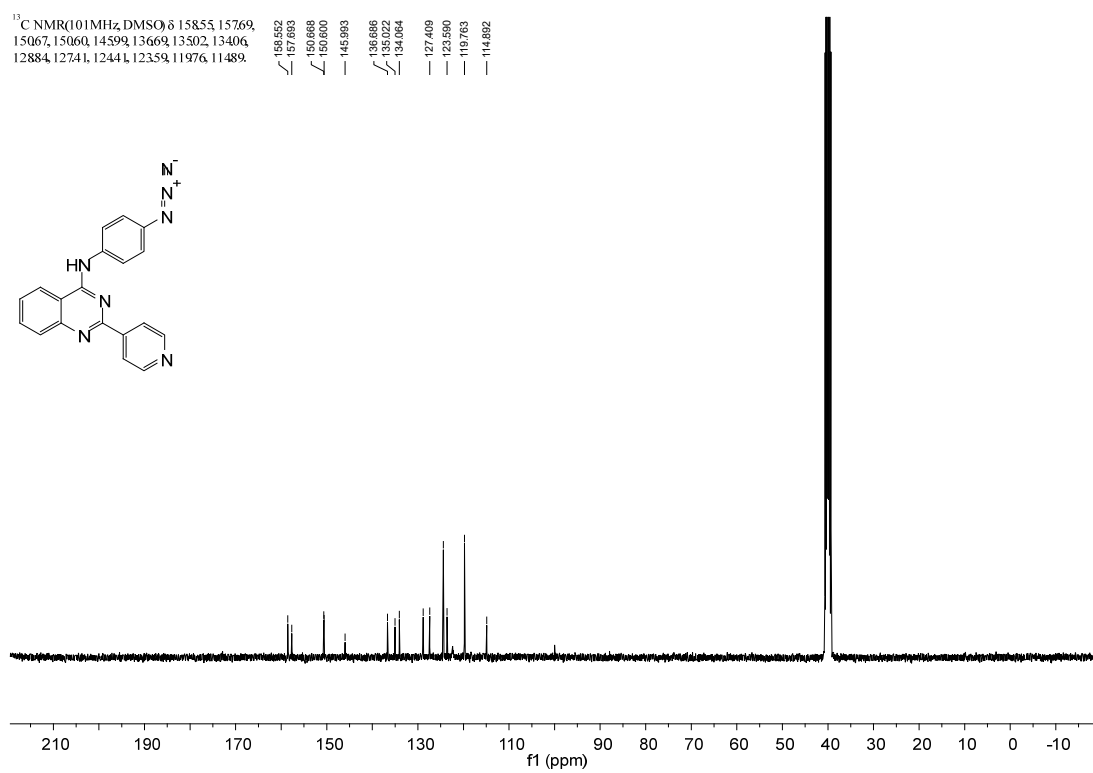

Figure S104. <sup>13</sup>C NMR (101 MHz, *d*<sub>6</sub>-DMSO) of **33**
